# Supplementary material for: Traumatic Brain Injury Characteristics Predictive of Subsequent Sleep-Wake Disturbances in Pediatric Patients
Source: MDPI journal article supplement (doi:10.3390/biology11040600), 2022-04-14
Supplement: s1 [file s1]

**Supplementary Table S1.** ICD 9 and ICD 10 codes for sleep-wake disturbances (SWD) and traumatic brain injury (TBI).

**ICD 9 codes SWD**

|       |                                                                              |
|-------|------------------------------------------------------------------------------|
| 32700 | Organic insomnia, unspecified                                                |
| 32701 | Insomnia due to medical condition classified elsewhere                       |
| 32702 | Insomnia due to mental disorder                                              |
| 32709 | Other organic insomnia                                                       |
| 32710 | Organic hypersomnia, unspecified                                             |
| 32711 | Idiopathic hypersomnia with long sleep time                                  |
| 32712 | Idiopathic hypersomnia without long sleep time                               |
| 32713 | Recurrent hypersomnia                                                        |
| 32714 | Hypersomnia due to medical condition classified elsewhere                    |
| 32715 | Hypersomnia due to mental disorder                                           |
| 32719 | Other organic hypersomnia                                                    |
| 32720 | Organic sleep apnea, unspecified                                             |
| 32721 | Primary central sleep apnea                                                  |
| 32722 | High altitude periodic breathing                                             |
| 32723 | Obstructive sleep apnea (adult)(pediatric)                                   |
| 32724 | Idiopathic sleep related non-obstructive alveolar hypoventilation            |
| 32725 | Congenital central alveolar hypoventilation syndrome                         |
| 32726 | Sleep related hypoventilation/hypoxemia in conditions classifiable elsewhere |
| 32727 | Central sleep apnea in conditions classified elsewhere                       |
| 32729 | Other organic sleep apnea                                                    |
| 32730 | Circadian rhythm sleep disorder, unspecified                                 |
| 32731 | Circadian rhythm sleep disorder, delayed sleep phase type                    |
| 32732 | Circadian rhythm sleep disorder, advanced sleep phase type                   |
| 32733 | Circadian rhythm sleep disorder, irregular sleep-wake type                   |
| 32734 | Circadian rhythm sleep disorder, free-running type                           |
| 32735 | Circadian rhythm sleep disorder, jet lag type                                |
| 32736 | Circadian rhythm sleep disorder, shift work type                             |
| 32737 | Circadian rhythm sleep disorder in conditions classified elsewhere           |
| 32739 | Other circadian rhythm sleep disorder                                        |
| 32740 | Organic parasomnia, unspecified                                              |
| 32741 | Confusional arousals                                                         |
| 32742 | REM sleep behavior disorder                                                  |
| 32743 | Recurrent isolated sleep paralysis                                           |
| 32744 | Parasomnia in conditions classified elsewhere                                |
| 32749 | Other organic parasomnia                                                     |
| 32751 | Periodic limb movement disorder                                              |
| 32752 | Sleep related leg cramps                                                     |

|       |                                                                  |
|-------|------------------------------------------------------------------|
| 32753 | Sleep related bruxism                                            |
| 32759 | Other organic sleep related movement disorders                   |
| 3278  | Other organic sleep disorders                                    |
| 34700 | Narcolepsy, without cataplexy                                    |
| 34701 | Narcolepsy, with cataplexy                                       |
| 34710 | Narcolepsy in conditions classified elsewhere, without cataplexy |
| 34711 | Narcolepsy in conditions classified elsewhere, with cataplexy    |
| 78050 | Sleep disturbance, unspecified                                   |
| 78051 | Insomnia with sleep apnea, unspecified                           |
| 78052 | Insomnia, unspecified                                            |
| 78053 | Hypersomnia with sleep apnea, unspecified                        |
| 78054 | Hypersomnia, unspecified                                         |
| 78055 | Disruption of 24 hour sleep wake cycle, unspecified              |
| 78056 | Dysfunctions associated with sleep stages or arousal from sleep  |
| 78057 | Unspecified sleep apnea                                          |
| 78058 | Sleep related movement disorder, unspecified                     |
| 78059 | Other sleep disturbances                                         |

#### ICD 9 Codes TBI

|       |                                                                                                                                                                                     |
|-------|-------------------------------------------------------------------------------------------------------------------------------------------------------------------------------------|
| 33920 | Post-traumatic headache, unspecified                                                                                                                                                |
| 33921 | Acute post-traumatic headache                                                                                                                                                       |
| 33922 | Chronic post-traumatic headache                                                                                                                                                     |
| 3484  | Compression of brain                                                                                                                                                                |
| 3485  | Cerebral edema                                                                                                                                                                      |
| 78001 | Coma                                                                                                                                                                                |
| 80002 | Closed fracture of vault of skull without mention of intracranial injury, with brief [less than one hour] loss of consciousness                                                     |
| 80003 | Closed fracture of vault of skull without mention of intracranial injury, with moderate [1-24 hours] loss of consciousness                                                          |
| 80004 | Closed fracture of vault of skull without mention of intracranial injury, with prolonged [more than 24 hours] loss of consciousness and return to pre-existing conscious level      |
| 80005 | Closed fracture of vault of skull without mention of intracranial injury, with prolonged [more than 24 hours] loss of consciousness, without return to pre-existing conscious level |
| 80006 | Closed fracture of vault of skull without mention of intracranial injury, with loss of consciousness of unspecified duration                                                        |
| 80009 | Closed fracture of vault of skull without mention of intracranial injury, with concussion, unspecified                                                                              |
| 80010 | Closed fracture of vault of skull with cerebral laceration and contusion, unspecified state of consciousness                                                                        |
| 80011 | Closed fracture of vault of skull with cerebral laceration and contusion, with no loss of consciousness                                                                             |

|       |                                                                                                                                                                                                     |
|-------|-----------------------------------------------------------------------------------------------------------------------------------------------------------------------------------------------------|
| 80012 | Closed fracture of vault of skull with cerebral laceration and contusion, with brief [less than one hour] loss of consciousness                                                                     |
| 80013 | Closed fracture of vault of skull with cerebral laceration and contusion, with moderate [1-24 hours] loss of consciousness                                                                          |
| 80014 | Closed fracture of vault of skull with cerebral laceration and contusion, with prolonged [more than 24 hours] loss of consciousness and return to pre-existing conscious level                      |
| 80015 | Closed fracture of vault of skull with cerebral laceration and contusion, with prolonged [more than 24 hours] loss of consciousness, without return to pre-existing conscious level                 |
| 80016 | Closed fracture of vault of skull with cerebral laceration and contusion, with loss of consciousness of unspecified duration                                                                        |
| 80019 | Closed fracture of vault of skull with cerebral laceration and contusion, with concussion, unspecified                                                                                              |
| 80020 | Closed fracture of vault of skull with subarachnoid, subdural, and extradural hemorrhage, unspecified state of consciousness                                                                        |
| 80021 | Closed fracture of vault of skull with subarachnoid, subdural, and extradural hemorrhage, with no loss of consciousness                                                                             |
| 80022 | Closed fracture of vault of skull with subarachnoid, subdural, and extradural hemorrhage, with brief [less than one hour] loss of consciousness                                                     |
| 80023 | Closed fracture of vault of skull with subarachnoid, subdural, and extradural hemorrhage, with moderate [1-24 hours] loss of consciousness                                                          |
| 80024 | Closed fracture of vault of skull with subarachnoid, subdural, and extradural hemorrhage, with prolonged [more than 24 hours] loss of consciousness and return to pre-existing conscious level      |
| 80025 | Closed fracture of vault of skull with subarachnoid, subdural, and extradural hemorrhage, with prolonged [more than 24 hours] loss of consciousness, without return to pre-existing conscious level |
| 80026 | Closed fracture of vault of skull with subarachnoid, subdural, and extradural hemorrhage, with loss of consciousness of unspecified duration                                                        |
| 80029 | Closed fracture of vault of skull with subarachnoid, subdural, and extradural hemorrhage, with concussion, unspecified                                                                              |
| 80030 | Closed fracture of vault of skull with other and unspecified intracranial hemorrhage, unspecified state of consciousness                                                                            |
| 80031 | Closed fracture of vault of skull with other and unspecified intracranial hemorrhage, with no loss of consciousness                                                                                 |
| 80032 | Closed fracture of vault of skull with other and unspecified intracranial hemorrhage, with brief [less than one hour] loss of consciousness                                                         |
| 80033 | Closed fracture of vault of skull with other and unspecified intracranial hemorrhage, with moderate [1-24 hours] loss of consciousness                                                              |
| 80034 | Closed fracture of vault of skull with other and unspecified intracranial hemorrhage, with prolonged [more than 24 hours] loss of consciousness and return to pre-existing conscious level          |
| 80035 | Closed fracture of vault of skull with other and unspecified intracranial hemorrhage, with prolonged [more than 24 hours] loss of consciousness, without return to pre-existing conscious level     |
| 80036 | Closed fracture of vault of skull with other and unspecified intracranial hemorrhage, with loss of consciousness of unspecified duration                                                            |

|       |                                                                                                                                                                                                       |
|-------|-------------------------------------------------------------------------------------------------------------------------------------------------------------------------------------------------------|
| 80039 | Closed fracture of vault of skull with other and unspecified intracranial hemorrhage, with concussion, unspecified                                                                                    |
| 80040 | Closed fracture of vault of skull with intracranial injury of other and unspecified nature, unspecified state of consciousness                                                                        |
| 80041 | Closed fracture of vault of skull with intracranial injury of other and unspecified nature, with no loss of consciousness                                                                             |
| 80042 | Closed fracture of vault of skull with intracranial injury of other and unspecified nature, with brief [less than one hour] loss of consciousness                                                     |
| 80043 | Closed fracture of vault of skull with intracranial injury of other and unspecified nature, with moderate [1-24 hours] loss of consciousness                                                          |
| 80044 | Closed fracture of vault of skull with intracranial injury of other and unspecified nature, with prolonged [more than 24 hours] loss of consciousness and return to pre-existing conscious level      |
| 80045 | Closed fracture of vault of skull with intracranial injury of other and unspecified nature, with prolonged [more than 24 hours] loss of consciousness, without return to pre-existing conscious level |
| 80046 | Closed fracture of vault of skull with intracranial injury of other and unspecified nature, with loss of consciousness of unspecified duration                                                        |
| 80049 | Closed fracture of vault of skull with intracranial injury of other and unspecified nature, with concussion, unspecified                                                                              |
| 80050 | Open fracture of vault of skull without mention of intracranial injury, unspecified state of consciousness                                                                                            |
| 80051 | Open fracture of vault of skull without mention of intracranial injury, with no loss of consciousness                                                                                                 |
| 80052 | Open fracture of vault of skull without mention of intracranial injury, with brief [less than one hour] loss of consciousness                                                                         |
| 80053 | Open fracture of vault of skull without mention of intracranial injury, with moderate [1-24 hours] loss of consciousness                                                                              |
| 80054 | Open fracture of vault of skull without mention of intracranial injury, with prolonged [more than 24 hours] loss of consciousness and return to pre-existing conscious level                          |
| 80055 | Open fracture of vault of skull without mention of intracranial injury, with prolonged [more than 24 hours] loss of consciousness, without return to pre-existing conscious level                     |
| 80056 | Open fracture of vault of skull without mention of intracranial injury, with loss of consciousness of unspecified duration                                                                            |
| 80059 | Open fracture of vault of skull without mention of intracranial injury, with concussion, unspecified                                                                                                  |
| 80060 | Open fracture of vault of skull with cerebral laceration and contusion, unspecified state of consciousness                                                                                            |
| 80061 | Open fracture of vault of skull with cerebral laceration and contusion, with no loss of consciousness                                                                                                 |
| 80062 | Open fracture of vault of skull with cerebral laceration and contusion, with brief [less than one hour] loss of consciousness                                                                         |
| 80063 | Open fracture of vault of skull with cerebral laceration and contusion, with moderate [1-24 hours] loss of consciousness                                                                              |
| 80064 | Open fracture of vault of skull with cerebral laceration and contusion, with prolonged [more than 24 hours] loss of consciousness and return to pre-existing conscious level                          |

|       |                                                                                                                                                                                                   |
|-------|---------------------------------------------------------------------------------------------------------------------------------------------------------------------------------------------------|
| 80065 | Open fracture of vault of skull with cerebral laceration and contusion, with prolonged [more than 24 hours] loss of consciousness, without return to pre-existing conscious level                 |
| 80066 | Open fracture of vault of skull with cerebral laceration and contusion, with loss of consciousness of unspecified duration                                                                        |
| 80069 | Open fracture of vault of skull with cerebral laceration and contusion, with concussion, unspecified                                                                                              |
| 80070 | Open fracture of vault of skull with subarachnoid, subdural, and extradural hemorrhage, unspecified state of consciousness                                                                        |
| 80071 | Open fracture of vault of skull with subarachnoid, subdural, and extradural hemorrhage, with no loss of consciousness                                                                             |
| 80072 | Open fracture of vault of skull with subarachnoid, subdural, and extradural hemorrhage, with brief [less than one hour] loss of consciousness                                                     |
| 80073 | Open fracture of vault of skull with subarachnoid, subdural, and extradural hemorrhage, with moderate [1-24 hours] loss of consciousness                                                          |
| 80074 | Open fracture of vault of skull with subarachnoid, subdural, and extradural hemorrhage, with prolonged [more than 24 hours] loss of consciousness and return to pre-existing conscious level      |
| 80075 | Open fracture of vault of skull with subarachnoid, subdural, and extradural hemorrhage, with prolonged [more than 24 hours] loss of consciousness, without return to pre-existing conscious level |
| 80076 | Open fracture of vault of skull with subarachnoid, subdural, and extradural hemorrhage, with loss of consciousness of unspecified duration                                                        |
| 80079 | Open fracture of vault of skull with subarachnoid, subdural, and extradural hemorrhage, with concussion, unspecified                                                                              |
| 80080 | Open fracture of vault of skull with other and unspecified intracranial hemorrhage, unspecified state of consciousness                                                                            |
| 80081 | Open fracture of vault of skull with other and unspecified intracranial hemorrhage, with no loss of consciousness                                                                                 |
| 80082 | Open fracture of vault of skull with other and unspecified intracranial hemorrhage, with brief [less than one hour] loss of consciousness                                                         |
| 80083 | Open fracture of vault of skull with other and unspecified intracranial hemorrhage, with moderate [1-24 hours] loss of consciousness                                                              |
| 80084 | Open fracture of vault of skull with other and unspecified intracranial hemorrhage, with prolonged [more than 24 hours] loss of consciousness and return to pre-existing conscious level          |
| 80085 | Open fracture of vault of skull with other and unspecified intracranial hemorrhage, with prolonged [more than 24 hours] loss of consciousness, without return to pre-existing conscious level     |
| 80086 | Open fracture of vault of skull with other and unspecified intracranial hemorrhage, with loss of consciousness of unspecified duration                                                            |
| 80089 | Open fracture of vault of skull with other and unspecified intracranial hemorrhage, with concussion, unspecified                                                                                  |
| 80090 | Open fracture of vault of skull with intracranial injury of other and unspecified nature, unspecified state of consciousness                                                                      |
| 80091 | Open fracture of vault of skull with intracranial injury of other and unspecified nature, with no loss of consciousness                                                                           |

|       |                                                                                                                                                                                                     |
|-------|-----------------------------------------------------------------------------------------------------------------------------------------------------------------------------------------------------|
| 80092 | Open fracture of vault of skull with intracranial injury of other and unspecified nature, with brief [less than one hour] loss of consciousness                                                     |
| 80093 | Open fracture of vault of skull with intracranial injury of other and unspecified nature, with moderate [1-24 hours] loss of consciousness                                                          |
| 80094 | Open fracture of vault of skull with intracranial injury of other and unspecified nature, with prolonged [more than 24 hours] loss of consciousness and return to pre-existing conscious level      |
| 80095 | Open fracture of vault of skull with intracranial injury of other and unspecified nature, with prolonged [more than 24 hours] loss of consciousness, without return to pre-existing conscious level |
| 80096 | Open fracture of vault of skull with intracranial injury of other and unspecified nature, with loss of consciousness of unspecified duration                                                        |
| 80099 | Open fracture of vault of skull with intracranial injury of other and unspecified nature, with concussion, unspecified                                                                              |
| 80100 | Closed fracture of base of skull without mention of intra cranial injury, unspecified state of consciousness                                                                                        |
| 80101 | Closed fracture of base of skull without mention of intra cranial injury, with no loss of consciousness                                                                                             |
| 80102 | Closed fracture of base of skull without mention of intra cranial injury, with brief [less than one hour] loss of consciousness                                                                     |
| 80103 | Closed fracture of base of skull without mention of intra cranial injury, with moderate [1-24 hours] loss of consciousness                                                                          |
| 80104 | Closed fracture of base of skull without mention of intra cranial injury, with prolonged [more than 24 hours] loss of consciousness and return to pre-existing conscious level                      |
| 80105 | Closed fracture of base of skull without mention of intra cranial injury, with prolonged [more than 24 hours] loss of consciousness, without return to pre-existing conscious level                 |
| 80106 | Closed fracture of base of skull without mention of intra cranial injury, with loss of consciousness of unspecified duration                                                                        |
| 80109 | Closed fracture of base of skull without mention of intra cranial injury, with concussion, unspecified                                                                                              |
| 80110 | Closed fracture of base of skull with cerebral laceration and contusion, unspecified state of consciousness                                                                                         |
| 80111 | Closed fracture of base of skull with cerebral laceration and contusion, with no loss of consciousness                                                                                              |
| 80112 | Closed fracture of base of skull with cerebral laceration and contusion, with brief [less than one hour] loss of consciousness                                                                      |
| 80113 | Closed fracture of base of skull with cerebral laceration and contusion, with moderate [1-24 hours] loss of consciousness                                                                           |
| 80114 | Closed fracture of base of skull with cerebral laceration and contusion, with prolonged [more than 24 hours] loss of consciousness and return to pre-existing conscious level                       |
| 80115 | Closed fracture of base of skull with cerebral laceration and contusion, with prolonged [more than 24 hours] loss of consciousness, without return to pre-existing conscious level                  |
| 80116 | Closed fracture of base of skull with cerebral laceration and contusion, with loss of consciousness of unspecified duration                                                                         |
| 80119 | Closed fracture of base of skull with cerebral laceration and contusion, with concussion, unspecified                                                                                               |

|       |                                                                                                                                                                                                    |
|-------|----------------------------------------------------------------------------------------------------------------------------------------------------------------------------------------------------|
| 80120 | Closed fracture of base of skull with subarachnoid, subdural, and extradural hemorrhage, unspecified state of consciousness                                                                        |
| 80121 | Closed fracture of base of skull with subarachnoid, subdural, and extradural hemorrhage, with no loss of consciousness                                                                             |
| 80122 | Closed fracture of base of skull with subarachnoid, subdural, and extradural hemorrhage, with brief [less than one hour] loss of consciousness                                                     |
| 80123 | Closed fracture of base of skull with subarachnoid, subdural, and extradural hemorrhage, with moderate [1-24 hours] loss of consciousness                                                          |
| 80124 | Closed fracture of base of skull with subarachnoid, subdural, and extradural hemorrhage, with prolonged [more than 24 hours] loss of consciousness and return to pre-existing conscious level      |
| 80125 | Closed fracture of base of skull with subarachnoid, subdural, and extradural hemorrhage, with prolonged [more than 24 hours] loss of consciousness, without return to pre-existing conscious level |
| 80126 | Closed fracture of base of skull with subarachnoid, subdural, and extradural hemorrhage, with loss of consciousness of unspecified duration                                                        |
| 80129 | Closed fracture of base of skull with subarachnoid, subdural, and extradural hemorrhage, with concussion, unspecified                                                                              |
| 80130 | Closed fracture of base of skull with other and unspecified intracranial hemorrhage, unspecified state of consciousness                                                                            |
| 80131 | Closed fracture of base of skull with other and unspecified intracranial hemorrhage, with no loss of consciousness                                                                                 |
| 80132 | Closed fracture of base of skull with other and unspecified intracranial hemorrhage, with brief [less than one hour] loss of consciousness                                                         |
| 80133 | Closed fracture of base of skull with other and unspecified intracranial hemorrhage, with moderate [1-24 hours] loss of consciousness                                                              |
| 80134 | Closed fracture of base of skull with other and unspecified intracranial hemorrhage, with prolonged [more than 24 hours] loss of consciousness and return to pre-existing conscious level          |
| 80135 | Closed fracture of base of skull with other and unspecified intracranial hemorrhage, with prolonged [more than 24 hours] loss of consciousness, without return to pre-existing conscious level     |
| 80136 | Closed fracture of base of skull with other and unspecified intracranial hemorrhage, with loss of consciousness of unspecified duration                                                            |
| 80139 | Closed fracture of base of skull with other and unspecified intracranial hemorrhage, with concussion, unspecified                                                                                  |
| 80140 | Closed fracture of base of skull with intracranial injury of other and unspecified nature, unspecified state of consciousness                                                                      |
| 80141 | Closed fracture of base of skull with intracranial injury of other and unspecified nature, with no loss of consciousness                                                                           |
| 80142 | Closed fracture of base of skull with intracranial injury of other and unspecified nature, with brief [less than one hour] loss of consciousness                                                   |
| 80143 | Closed fracture of base of skull with intracranial injury of other and unspecified nature, with moderate [1-24 hours] loss of consciousness                                                        |

|       |                                                                                                                                                                                                      |
|-------|------------------------------------------------------------------------------------------------------------------------------------------------------------------------------------------------------|
| 80144 | Closed fracture of base of skull with intracranial injury of other and unspecified nature, with prolonged [more than 24 hours] loss of consciousness and return to pre-existing conscious level      |
| 80145 | Closed fracture of base of skull with intracranial injury of other and unspecified nature, with prolonged [more than 24 hours] loss of consciousness, without return to pre-existing conscious level |
| 80146 | Closed fracture of base of skull with intracranial injury of other and unspecified nature, with loss of consciousness of unspecified duration                                                        |
| 80149 | Closed fracture of base of skull with intracranial injury of other and unspecified nature, with concussion, unspecified                                                                              |
| 80150 | Open fracture of base of skull without mention of intracranial injury, unspecified state of consciousness                                                                                            |
| 80151 | Open fracture of base of skull without mention of intracranial injury, with no loss of consciousness                                                                                                 |
| 80152 | Open fracture of base of skull without mention of intracranial injury, with brief [less than one hour] loss of consciousness                                                                         |
| 80153 | Open fracture of base of skull without mention of intracranial injury, with moderate [1-24 hours] loss of consciousness                                                                              |
| 80154 | Open fracture of base of skull without mention of intracranial injury, with prolonged [more than 24 hours] loss of consciousness and return to pre-existing conscious level                          |
| 80155 | Open fracture of base of skull without mention of intracranial injury, with prolonged [more than 24 hours] loss of consciousness, without return to pre-existing conscious level                     |
| 80156 | Open fracture of base of skull without mention of intracranial injury, with loss of consciousness of unspecified duration                                                                            |
| 80159 | Open fracture of base of skull without mention of intracranial injury, with concussion, unspecified                                                                                                  |
| 80160 | Open fracture of base of skull with cerebral laceration and contusion, unspecified state of consciousness                                                                                            |
| 80161 | Open fracture of base of skull with cerebral laceration and contusion, with no loss of consciousness                                                                                                 |
| 80162 | Open fracture of base of skull with cerebral laceration and contusion, with brief [less than one hour] loss of consciousness                                                                         |
| 80163 | Open fracture of base of skull with cerebral laceration and contusion, with moderate [1-24 hours] loss of consciousness                                                                              |
| 80164 | Open fracture of base of skull with cerebral laceration and contusion, with prolonged [more than 24 hours] loss of consciousness and return to pre-existing conscious level                          |
| 80165 | Open fracture of base of skull with cerebral laceration and contusion, with prolonged [more than 24 hours] loss of consciousness, without return to pre-existing conscious level                     |
| 80166 | Open fracture of base of skull with cerebral laceration and contusion, with loss of consciousness of unspecified duration                                                                            |
| 80169 | Open fracture of base of skull with cerebral laceration and contusion, with concussion, unspecified                                                                                                  |
| 80170 | Open fracture of base of skull with subarachnoid, subdural, and extradural hemorrhage, unspecified state of consciousness                                                                            |
| 80171 | Open fracture of base of skull with subarachnoid, subdural, and extradural hemorrhage, with no loss of consciousness                                                                                 |



|       |                                                                                                                                                                                                    |
|-------|----------------------------------------------------------------------------------------------------------------------------------------------------------------------------------------------------|
| 80172 | Open fracture of base of skull with subarachnoid, subdural, and extradural hemorrhage, with brief [less than one hour] loss of consciousness                                                       |
| 80173 | Open fracture of base of skull with subarachnoid, subdural, and extradural hemorrhage, with moderate [1-24 hours] loss of consciousness                                                            |
| 80174 | Open fracture of base of skull with subarachnoid, subdural, and extradural hemorrhage, with prolonged [more than 24 hours] loss of consciousness and return to pre-existing conscious level        |
| 80175 | Open fracture of base of skull with subarachnoid, subdural, and extradural hemorrhage, with prolonged [more than 24 hours] loss of consciousness, without return to pre-existing conscious level   |
| 80176 | Open fracture of base of skull with subarachnoid, subdural, and extradural hemorrhage, with loss of consciousness of unspecified duration                                                          |
| 80179 | Open fracture of base of skull with subarachnoid, subdural, and extradural hemorrhage, with concussion, unspecified                                                                                |
| 80180 | Open fracture of base of skull with other and unspecified intracranial hemorrhage, unspecified state of consciousness                                                                              |
| 80181 | Open fracture of base of skull with other and unspecified intracranial hemorrhage, with no loss of consciousness                                                                                   |
| 80182 | Open fracture of base of skull with other and unspecified intracranial hemorrhage, with brief [less than one hour] loss of consciousness                                                           |
| 80183 | Open fracture of base of skull with other and unspecified intracranial hemorrhage, with moderate [1-24 hours] loss of consciousness                                                                |
| 80184 | Open fracture of base of skull with other and unspecified intracranial hemorrhage, with prolonged [more than 24 hours] loss of consciousness and return to pre-existing conscious level            |
| 80185 | Open fracture of base of skull with other and unspecified intracranial hemorrhage, with prolonged [more than 24 hours] loss of consciousness, without return to pre-existing conscious level       |
| 80186 | Open fracture of base of skull with other and unspecified intracranial hemorrhage, with loss of consciousness of unspecified duration                                                              |
| 80189 | Open fracture of base of skull with other and unspecified intracranial hemorrhage, with concussion, unspecified                                                                                    |
| 80190 | Open fracture of base of skull with intracranial injury of other and unspecified nature, unspecified state of consciousness                                                                        |
| 80191 | Open fracture of base of skull with intracranial injury of other and unspecified nature, with no loss of consciousness                                                                             |
| 80192 | Open fracture of base of skull with intracranial injury of other and unspecified nature, with brief [less than one hour] loss of consciousness                                                     |
| 80193 | Open fracture of base of skull with intracranial injury of other and unspecified nature, with moderate [1-24 hours] loss of consciousness                                                          |
| 80194 | Open fracture of base of skull with intracranial injury of other and unspecified nature, with prolonged [more than 24 hours] loss of consciousness and return to pre-existing conscious level      |
| 80195 | Open fracture of base of skull with intracranial injury of other and unspecified nature, with prolonged [more than 24 hours] loss of consciousness, without return to pre-existing conscious level |

|       |                                                                                                                                                                               |
|-------|-------------------------------------------------------------------------------------------------------------------------------------------------------------------------------|
| 80196 | Open fracture of base of skull with intracranial injury of other and unspecified nature, with loss of consciousness of unspecified duration                                   |
| 80199 | Open fracture of base of skull with intracranial injury of other and unspecified nature, with concussion, unspecified                                                         |
| 80300 | Other closed skull fracture without mention of intracranial injury, unspecified state of consciousness                                                                        |
| 80301 | Other closed skull fracture without mention of intracranial injury, with no loss of consciousness                                                                             |
| 80302 | Other closed skull fracture without mention of intracranial injury, with brief [less than one hour] loss of consciousness                                                     |
| 80303 | Other closed skull fracture without mention of intracranial injury, with moderate [1-24 hours] loss of consciousness                                                          |
| 80304 | Other closed skull fracture without mention of intracranial injury, with prolonged [more than 24 hours] loss of consciousness and return to pre-existing conscious level      |
| 80305 | Other closed skull fracture without mention of intracranial injury, with prolonged [more than 24 hours] loss of consciousness, without return to pre-existing conscious level |
| 80306 | Other closed skull fracture without mention of intracranial injury, with loss of consciousness of unspecified duration                                                        |
| 80309 | Other closed skull fracture without mention of intracranial injury, with concussion, unspecified                                                                              |
| 80310 | Other closed skull fracture with cerebral laceration and contusion, unspecified state of consciousness                                                                        |
| 80311 | Other closed skull fracture with cerebral laceration and contusion, with no loss of consciousness                                                                             |
| 80312 | Other closed skull fracture with cerebral laceration and contusion, with brief [less than one hour] loss of consciousness                                                     |
| 80313 | Other closed skull fracture with cerebral laceration and contusion, with moderate [1-24 hours] loss of consciousness                                                          |
| 80314 | Other closed skull fracture with cerebral laceration and contusion, with prolonged [more than 24 hours] loss of consciousness and return to pre-existing conscious level      |
| 80315 | Other closed skull fracture with cerebral laceration and contusion, with prolonged [more than 24 hours] loss of consciousness, without return to pre-existing conscious level |
| 80316 | Other closed skull fracture with cerebral laceration and contusion, with loss of consciousness of unspecified duration                                                        |
| 80319 | Other closed skull fracture with cerebral laceration and contusion, with concussion, unspecified                                                                              |
| 80320 | Other closed skull fracture with subarachnoid, subdural, and extradural hemorrhage, unspecified state of consciousness                                                        |
| 80321 | Other closed skull fracture with subarachnoid, subdural, and extradural hemorrhage, with no loss of consciousness                                                             |
| 80322 | Other closed skull fracture with subarachnoid, subdural, and extradural hemorrhage, with brief [less than one hour] loss of consciousness                                     |
| 80323 | Other closed skull fracture with subarachnoid, subdural, and extradural hemorrhage, with moderate [1-24 hours] loss of consciousness                                          |

|       |                                                                                                                                                                                                 |
|-------|-------------------------------------------------------------------------------------------------------------------------------------------------------------------------------------------------|
| 80324 | Other closed skull fracture with subarachnoid, subdural, and extradural hemorrhage, with prolonged [more than 24 hours] loss of consciousness and return to pre-existing conscious level        |
| 80325 | Other closed skull fracture with subarachnoid, subdural, and extradural hemorrhage, with prolonged [more than 24 hours] loss of consciousness, without return to pre-existing conscious level   |
| 80326 | Other closed skull fracture with subarachnoid, subdural, and extradural hemorrhage, with loss of consciousness of unspecified duration                                                          |
| 80329 | Other closed skull fracture with subarachnoid, subdural, and extradural hemorrhage, with concussion, unspecified                                                                                |
| 80330 | Other closed skull fracture with other and unspecified intracranial hemorrhage, unspecified state of unconsciousness                                                                            |
| 80331 | Other closed skull fracture with other and unspecified intracranial hemorrhage, with no loss of consciousness                                                                                   |
| 80332 | Other closed skull fracture with other and unspecified intracranial hemorrhage, with brief [less than one hour] loss of consciousness                                                           |
| 80333 | Other closed skull fracture with other and unspecified intracranial hemorrhage, with moderate [1-24 hours] loss of consciousness                                                                |
| 80334 | Other closed skull fracture with other and unspecified intracranial hemorrhage, with prolonged [more than 24 hours] loss of consciousness and return to pre-existing conscious level            |
| 80335 | Other closed skull fracture with other and unspecified intracranial hemorrhage, with prolonged [more than 24 hours] loss of consciousness, without return to pre-existing conscious level       |
| 80336 | Other closed skull fracture with other and unspecified intracranial hemorrhage, with loss of consciousness of unspecified duration                                                              |
| 80339 | Other closed skull fracture with other and unspecified intracranial hemorrhage, with concussion, unspecified                                                                                    |
| 80340 | Other closed skull fracture with intracranial injury of other and unspecified nature, unspecified state of consciousness                                                                        |
| 80341 | Other closed skull fracture with intracranial injury of other and unspecified nature, with no loss of consciousness                                                                             |
| 80342 | Other closed skull fracture with intracranial injury of other and unspecified nature, with brief [less than one hour] loss of consciousness                                                     |
| 80343 | Other closed skull fracture with intracranial injury of other and unspecified nature, with moderate [1-24 hours] loss of consciousness                                                          |
| 80344 | Other closed skull fracture with intracranial injury of other and unspecified nature, with prolonged [more than 24 hours] loss of consciousness and return to pre-existing conscious level      |
| 80345 | Other closed skull fracture with intracranial injury of other and unspecified nature, with prolonged [more than 24 hours] loss of consciousness, without return to pre-existing conscious level |
| 80346 | Other closed skull fracture with intracranial injury of other and unspecified nature, with loss of consciousness of unspecified duration                                                        |
| 80349 | Other closed skull fracture with intracranial injury of other and unspecified nature, with concussion, unspecified                                                                              |

|       |                                                                                                                                                                                             |
|-------|---------------------------------------------------------------------------------------------------------------------------------------------------------------------------------------------|
| 80350 | Other open skull fracture without mention of injury, unspecified state of consciousness                                                                                                     |
| 80351 | Other open skull fracture without mention of intracranial injury, with no loss of consciousness                                                                                             |
| 80352 | Other open skull fracture without mention of intracranial injury, with brief [less than one hour] loss of consciousness                                                                     |
| 80353 | Other open skull fracture without mention of intracranial injury, with moderate [1-24 hours] loss of consciousness                                                                          |
| 80354 | Other open skull fracture without mention of intracranial injury, with prolonged [more than 24 hours] loss of consciousness and return to pre-existing conscious level                      |
| 80355 | Other open skull fracture without mention of intracranial injury, with prolonged [more than 24 hours] loss of consciousness, without return to pre-existing conscious level                 |
| 80356 | Other open skull fracture without mention of intracranial injury, with loss of consciousness of unspecified duration                                                                        |
| 80359 | Other open skull fracture without mention of intracranial injury, with concussion, unspecified                                                                                              |
| 80360 | Other open skull fracture with cerebral laceration and contusion, unspecified state of consciousness                                                                                        |
| 80361 | Other open skull fracture with cerebral laceration and contusion, with no loss of consciousness                                                                                             |
| 80362 | Other open skull fracture with cerebral laceration and contusion, with brief [less than one hour] loss of consciousness                                                                     |
| 80363 | Other open skull fracture with cerebral laceration and contusion, with moderate [1-24 hours] loss of consciousness                                                                          |
| 80364 | Other open skull fracture with cerebral laceration and contusion, with prolonged [more than 24 hours] loss of consciousness and return to pre-existing conscious level                      |
| 80365 | Other open skull fracture with cerebral laceration and contusion, with prolonged [more than 24 hours] loss of consciousness, without return to pre-existing conscious level                 |
| 80366 | Other open skull fracture with cerebral laceration and contusion, with loss of consciousness of unspecified duration                                                                        |
| 80369 | Other open skull fracture with cerebral laceration and contusion, with concussion, unspecified                                                                                              |
| 80370 | Other open skull fracture with subarachnoid, subdural, and extradural hemorrhage, unspecified state of consciousness                                                                        |
| 80371 | Other open skull fracture with subarachnoid, subdural, and extradural hemorrhage, with no loss of consciousness                                                                             |
| 80372 | Other open skull fracture with subarachnoid, subdural, and extradural hemorrhage, with brief [less than one hour] loss of consciousness                                                     |
| 80373 | Other open skull fracture with subarachnoid, subdural, and extradural hemorrhage, with moderate [1-24 hours] loss of consciousness                                                          |
| 80374 | Other open skull fracture with subarachnoid, subdural, and extradural hemorrhage, with prolonged [more than 24 hours] loss of consciousness and return to pre-existing conscious level      |
| 80375 | Other open skull fracture with subarachnoid, subdural, and extradural hemorrhage, with prolonged [more than 24 hours] loss of consciousness, without return to pre-existing conscious level |

|       |                                                                                                                                                                                               |
|-------|-----------------------------------------------------------------------------------------------------------------------------------------------------------------------------------------------|
| 80376 | Other open skull fracture with subarachnoid, subdural, and extradural hemorrhage, with loss of consciousness of unspecified duration                                                          |
| 80379 | Other open skull fracture with subarachnoid, subdural, and extradural hemorrhage, with concussion, unspecified                                                                                |
| 80380 | Other open skull fracture with other and unspecified intracranial hemorrhage, unspecified state of consciousness                                                                              |
| 80381 | Other open skull fracture with other and unspecified intracranial hemorrhage, with no loss of consciousness                                                                                   |
| 80382 | Other open skull fracture with other and unspecified intracranial hemorrhage, with brief [less than one hour] loss of consciousness                                                           |
| 80383 | Other open skull fracture with other and unspecified intracranial hemorrhage, with moderate [1-24 hours] loss of consciousness                                                                |
| 80384 | Other open skull fracture with other and unspecified intracranial hemorrhage, with prolonged [more than 24 hours] loss of consciousness and return to pre-existing conscious level            |
| 80385 | Other open skull fracture with other and unspecified intracranial hemorrhage, with prolonged [more than 24 hours] loss of consciousness, without return to pre-existing conscious level       |
| 80386 | Other open skull fracture with other and unspecified intracranial hemorrhage, with loss of consciousness of unspecified duration                                                              |
| 80389 | Other open skull fracture with other and unspecified intracranial hemorrhage, with concussion, unspecified                                                                                    |
| 80390 | Other open skull fracture with intracranial injury of other and unspecified nature, unspecified state of consciousness                                                                        |
| 80391 | Other open skull fracture with intracranial injury of other and unspecified nature, with no loss of consciousness                                                                             |
| 80392 | Other open skull fracture with intracranial injury of other and unspecified nature, with brief [less than one hour] loss of consciousness                                                     |
| 80393 | Other open skull fracture with intracranial injury of other and unspecified nature, with moderate [1-24 hours] loss of consciousness                                                          |
| 80394 | Other open skull fracture with intracranial injury of other and unspecified nature, with prolonged [more than 24 hours] loss of consciousness and return to pre-existing conscious level      |
| 80395 | Other open skull fracture with intracranial injury of other and unspecified nature, with prolonged [more than 24 hours] loss of consciousness, without return to pre-existing conscious level |
| 80396 | Other open skull fracture with intracranial injury of other and unspecified nature, with loss of consciousness of unspecified duration                                                        |
| 80399 | Other open skull fracture with intracranial injury of other and unspecified nature, with concussion, unspecified                                                                              |
| 80400 | Closed fractures involving skull or face with other bones, without mention of intracranial injury, unspecified state of consciousness                                                         |
| 80401 | Closed fractures involving skull or face with other bones, without mention of intracranial injury, with no loss of consciousness                                                              |
| 80402 | Closed fractures involving skull or face with other bones, without mention of intracranial injury, with brief [less than one hour] loss of consciousness                                      |

|       |                                                                                                                                                                                                                             |
|-------|-----------------------------------------------------------------------------------------------------------------------------------------------------------------------------------------------------------------------------|
| 80403 | Closed fractures involving skull or face with other bones, without mention of intracranial injury, with moderate [1-24 hours] loss of consciousness                                                                         |
| 80404 | Closed fractures involving skull or face with other bones, without mention or intracranial injury, with prolonged [more than 24 hours] loss of consciousness and return to pre-existing conscious level                     |
| 80405 | Closed fractures involving skull of face with other bones, without mention of intracranial injury, with prolonged [more than 24 hours] loss of consciousness, without return to pre-existing conscious level                |
| 80406 | Closed fractures involving skull of face with other bones, without mention of intracranial injury, with loss of consciousness of unspecified duration                                                                       |
| 80409 | Closed fractures involving skull of face with other bones, without mention of intracranial injury, with concussion, unspecified                                                                                             |
| 80410 | Closed fractures involving skull or face with other bones, with cerebral laceration and contusion, unspecified state of consciousness                                                                                       |
| 80411 | Closed fractures involving skull or face with other bones, with cerebral laceration and contusion, with no loss of consciousness                                                                                            |
| 80412 | Closed fractures involving skull or face with other bones, with cerebral laceration and contusion, with brief [less than one hour] loss of consciousness                                                                    |
| 80413 | Closed fractures involving skull or face with other bones, with cerebral laceration and contusion, with moderate [1-24 hours] loss of consciousness                                                                         |
| 80414 | Closed fractures involving skull or face with other bones, with cerebral laceration and contusion, with prolonged [more than 24 hours] loss of consciousness and return to pre-existing conscious level                     |
| 80415 | Closed fractures involving skull or face with other bones, with cerebral laceration and contusion, with prolonged [more than 24 hours] loss of consciousness, without return to pre-existing conscious level                |
| 80416 | Closed fractures involving skull or face with other bones, with cerebral laceration and contusion, with loss of consciousness of unspecified duration                                                                       |
| 80419 | Closed fractures involving skull or face with other bones, with cerebral laceration and contusion, with concussion, unspecified                                                                                             |
| 80420 | Closed fractures involving skull or face with other bones with subarachnoid, subdural, and extradural hemorrhage, unspecified state of consciousness                                                                        |
| 80421 | Closed fractures involving skull or face with other bones with subarachnoid, subdural, and extradural hemorrhage, with no loss of consciousness                                                                             |
| 80422 | Closed fractures involving skull or face with other bones with subarachnoid, subdural, and extradural hemorrhage, with brief [less than one hour] loss of consciousness                                                     |
| 80423 | Closed fractures involving skull or face with other bones with subarachnoid, subdural, and extradural hemorrhage, with moderate [1-24 hours] loss of consciousness                                                          |
| 80424 | Closed fractures involving skull or face with other bones with subarachnoid, subdural, and extradural hemorrhage, with prolonged [more than 24 hours] loss of consciousness and return to pre-existing conscious level      |
| 80425 | Closed fractures involving skull or face with other bones with subarachnoid, subdural, and extradural hemorrhage, with prolonged [more than 24 hours] loss of consciousness, without return to pre-existing conscious level |
| 80426 | Closed fractures involving skull or face with other bones with subarachnoid, subdural, and extradural hemorrhage, with loss of consciousness of unspecified duration                                                        |

|       |                                                                                                                                                                                                                                |
|-------|--------------------------------------------------------------------------------------------------------------------------------------------------------------------------------------------------------------------------------|
| 80429 | Closed fractures involving skull or face with other bones with subarachnoid, subdural, and extradural hemorrhage, with concussion, unspecified                                                                                 |
| 80430 | Closed fractures involving skull or face with other bones, with other and unspecified intracranial hemorrhage, unspecified state of consciousness                                                                              |
| 80431 | Closed fractures involving skull or face with other bones, with other and unspecified intracranial hemorrhage, with no loss of consciousness                                                                                   |
| 80432 | Closed fractures involving skull or face with other bones, with other and unspecified intracranial hemorrhage, with brief [less than one hour] loss of consciousness                                                           |
| 80433 | Closed fractures involving skull or face with other bones, with other and unspecified intracranial hemorrhage, with moderate [1-24 hours] loss of consciousness                                                                |
| 80434 | Closed fractures involving skull or face with other bones, with other and unspecified intracranial hemorrhage, with prolonged [more than 24 hours] loss of consciousness and return to pre-existing conscious level            |
| 80435 | Closed fractures involving skull or face with other bones, with other and unspecified intracranial hemorrhage, with prolonged [more than 24 hours] loss of consciousness, without return to pre-existing conscious level       |
| 80436 | Closed fractures involving skull or face with other bones, with other and unspecified intracranial hemorrhage, with loss of consciousness of unspecified duration                                                              |
| 80439 | Closed fractures involving skull or face with other bones, with other and unspecified intracranial hemorrhage, with concussion, unspecified                                                                                    |
| 80440 | Closed fractures involving skull or face with other bones, with intracranial injury of other and unspecified nature, unspecified state of consciousness                                                                        |
| 80441 | Closed fractures involving skull or face with other bones, with intracranial injury of other and unspecified nature, with no loss of consciousness                                                                             |
| 80442 | Closed fractures involving skull or face with other bones, with intracranial injury of other and unspecified nature, with brief [less than one hour] loss of consciousness                                                     |
| 80443 | Closed fractures involving skull or face with other bones, with intracranial injury of other and unspecified nature, with moderate [1-24 hours] loss of consciousness                                                          |
| 80444 | Closed fractures involving skull or face with other bones, with intracranial injury of other and unspecified nature, with prolonged [more than 24 hours] loss of consciousness and return to pre-existing conscious level      |
| 80445 | Closed fractures involving skull or face with other bones, with intracranial injury of other and unspecified nature, with prolonged [more than 24 hours] loss of consciousness, without return to pre-existing conscious level |
| 80446 | Closed fractures involving skull or face with other bones, with intracranial injury of other and unspecified nature, with loss of consciousness of unspecified duration                                                        |
| 80449 | Closed fractures involving skull or face with other bones, with intracranial injury of other and unspecified nature, with concussion, unspecified                                                                              |
| 80450 | Open fractures involving skull or face with other bones, without mention of intracranial injury, unspecified state of consciousness                                                                                            |
| 80451 | Open fractures involving skull or face with other bones, without mention of intracranial injury, with no loss of consciousness                                                                                                 |
| 80452 | Open fractures involving skull or face with other bones, without mention of intracranial injury, with brief [less than one hour] loss of consciousness                                                                         |
| 80453 | Open fractures involving skull or face with other bones, without mention of intracranial injury, with moderate [1-24 hours] loss of consciousness                                                                              |

|       |                                                                                                                                                                                                                           |
|-------|---------------------------------------------------------------------------------------------------------------------------------------------------------------------------------------------------------------------------|
| 80454 | Open fractures involving skull or face with other bones, without mention of intracranial injury, with prolonged [more than 24 hours] loss of consciousness and return to pre-existing conscious level                     |
| 80455 | Open fractures involving skull or face with other bones, without mention of intracranial injury, with prolonged [more than 24 hours] loss of consciousness, without return to pre-existing conscious level                |
| 80456 | Open fractures involving skull or face with other bones, without mention of intracranial injury, with loss of consciousness of unspecified duration                                                                       |
| 80459 | Open fractures involving skull or face with other bones, without mention of intracranial injury, with concussion, unspecified                                                                                             |
| 80460 | Open fractures involving skull or face with other bones, with cerebral laceration and contusion, unspecified state of consciousness                                                                                       |
| 80461 | Open fractures involving skull or face with other bones, with cerebral laceration and contusion, with no loss of consciousness                                                                                            |
| 80462 | Open fractures involving skull or face with other bones, with cerebral laceration and contusion, with brief [less than one hour] loss of consciousness                                                                    |
| 80463 | Open fractures involving skull or face with other bones, with cerebral laceration and contusion, with moderate [1-24 hours] loss of consciousness                                                                         |
| 80464 | Open fractures involving skull or face with other bones, with cerebral laceration and contusion, with prolonged [more than 24 hours] loss of consciousness and return to pre-existing conscious level                     |
| 80465 | Open fractures involving skull or face with other bones, with cerebral laceration and contusion, with prolonged [more than 24 hours] loss of consciousness, without return to pre-existing conscious level                |
| 80466 | Open fractures involving skull or face with other bones, with cerebral laceration and contusion, with loss of consciousness of unspecified duration                                                                       |
| 80469 | Open fractures involving skull or face with other bones, with cerebral laceration and contusion, with concussion, unspecified                                                                                             |
| 80470 | Open fractures involving skull or face with other bones with subarachnoid, subdural, and extradural hemorrhage, unspecified state of consciousness                                                                        |
| 80471 | Open fractures involving skull or face with other bones with subarachnoid, subdural, and extradural hemorrhage, with no loss of consciousness                                                                             |
| 80472 | Open fractures involving skull or face with other bones with subarachnoid, subdural, and extradural hemorrhage, with brief [less than one hour] loss of consciousness                                                     |
| 80473 | Open fractures involving skull or face with other bones with subarachnoid, subdural, and extradural hemorrhage, with moderate [1-24 hours] loss of consciousness                                                          |
| 80474 | Open fractures involving skull or face with other bones with subarachnoid, subdural, and extradural hemorrhage, with prolonged [more than 24 hours] loss of consciousness and return to pre-existing conscious level      |
| 80475 | Open fractures involving skull or face with other bones with subarachnoid, subdural, and extradural hemorrhage, with prolonged [more than 24 hours] loss of consciousness, without return to pre-existing conscious level |
| 80476 | Open fractures involving skull or face with other bones with subarachnoid, subdural, and extradural hemorrhage, with loss of consciousness of unspecified duration                                                        |
| 80479 | Open fractures involving skull or face with other bones with subarachnoid, subdural, and extradural hemorrhage, with concussion, unspecified                                                                              |



|       |                                                                                                                                                                                                                             |
|-------|-----------------------------------------------------------------------------------------------------------------------------------------------------------------------------------------------------------------------------|
| 80480 | Open fractures involving skull or face with other bones, with other and unspecified intracranial hemorrhage, unspecified state of consciousness                                                                             |
| 80481 | Open fractures involving skull or face with other bones, with other and unspecified intracranial hemorrhage, with no loss of consciousness                                                                                  |
| 80482 | Open fractures involving skull or face with other bones, with other and unspecified intracranial hemorrhage, with brief [less than one hour] loss of consciousness                                                          |
| 80483 | Open fractures involving skull or face with other bones, with other and unspecified intracranial hemorrhage, with moderate [1-24 hours] loss of consciousness                                                               |
| 80484 | Open fractures involving skull or face with other bones, with other and unspecified intracranial hemorrhage, with prolonged [more than 24 hours] loss of consciousness and return to pre-existing conscious level           |
| 80485 | Open fractures involving skull or face with other bones, with other and unspecified intracranial hemorrhage, with prolonged [more than 24 hours] loss consciousness, without return to pre-existing conscious level         |
| 80486 | Open fractures involving skull or face with other bones, with other and unspecified intracranial hemorrhage, with loss of consciousness of unspecified duration                                                             |
| 80489 | Open fractures involving skull or face with other bones, with other and unspecified intracranial hemorrhage, with concussion, unspecified                                                                                   |
| 80490 | Open fractures involving skull or face with other bones, with intracranial injury of other and unspecified nature, unspecified state of consciousness                                                                       |
| 80491 | Open fractures involving skull or face with other bones, with intracranial injury of other and unspecified nature, with no loss of consciousness                                                                            |
| 80492 | Open fractures involving skull or face with other bones, with intracranial injury of other and unspecified nature, with brief [less than one hour] loss of consciousness                                                    |
| 80493 | Open fractures involving skull or face with other bones, with intracranial injury of other and unspecified nature, with moderate [1-24 hours] loss of consciousness                                                         |
| 80494 | Open fractures involving skull or face with other bones, with intracranial injury of other and unspecified nature, with prolonged [more than 24 hours] loss of consciousness and return to pre-existing conscious level     |
| 80495 | Open fractures involving skull or face with other bones, with intracranial injury of other and unspecified nature, with prolonged [more than 24 hours] loss of consciousness without return to pre-existing conscious level |
| 80496 | Open fractures involving skull or face with other bones, with intracranial injury of other and unspecified nature, with loss of consciousness of unspecified duration                                                       |
| 80499 | Open fractures involving skull or face with other bones, with intracranial injury of other and unspecified nature, with concussion, unspecified                                                                             |
| 8500  | Concussion with no loss of consciousness                                                                                                                                                                                    |
| 85011 | Concussion, with loss of consciousness of 30 minutes or less                                                                                                                                                                |
| 85012 | Concussion, with loss of consciousness from 31 to 59 minutes                                                                                                                                                                |
| 8502  | Concussion with moderate loss of consciousness                                                                                                                                                                              |
| 8503  | Concussion with prolonged loss of consciousness and return to pre-existing conscious level                                                                                                                                  |
| 8504  | Concussion with prolonged loss of consciousness, without return to pre-existing conscious level                                                                                                                             |
| 8505  | Concussion with loss of consciousness of unspecified duration                                                                                                                                                               |
| 8509  | Concussion, unspecified                                                                                                                                                                                                     |

|       |                                                                                                                                                                                   |
|-------|-----------------------------------------------------------------------------------------------------------------------------------------------------------------------------------|
| 85100 | Cortex (cerebral) contusion without mention of open intracranial wound, unspecified state of consciousness                                                                        |
| 85101 | Cortex (cerebral) contusion without mention of open intracranial wound, with no loss of consciousness                                                                             |
| 85102 | Cortex (cerebral) contusion without mention of open intracranial wound, with brief [less than one hour] loss of consciousness                                                     |
| 85103 | Cortex (cerebral) contusion without mention of open intracranial wound, with moderate [1-24 hours] loss of consciousness                                                          |
| 85104 | Cortex (cerebral) contusion without mention of open intracranial wound, with prolonged [more than 24 hours] loss of consciousness and return to pre-existing conscious level      |
| 85105 | Cortex (cerebral) contusion without mention of open intracranial wound, with prolonged [more than 24 hours] loss of consciousness without return to pre-existing conscious level  |
| 85106 | Cortex (cerebral) contusion without mention of open intracranial wound, with loss of consciousness of unspecified duration                                                        |
| 85109 | Cortex (cerebral) contusion without mention of open intracranial wound, with concussion, unspecified                                                                              |
| 85110 | Cortex (cerebral) contusion with open intracranial wound, unspecified state of consciousness                                                                                      |
| 85111 | Cortex (cerebral) contusion with open intracranial wound, with no loss of consciousness                                                                                           |
| 85112 | Cortex (cerebral) contusion with open intracranial wound, with brief [less than one hour] loss of consciousness                                                                   |
| 85113 | Cortex (cerebral) contusion with open intracranial wound, with moderate [1-24 hours] loss of consciousness                                                                        |
| 85114 | Cortex (cerebral) contusion with open intracranial wound, with prolonged [more than 24 hours] loss of consciousness and return to pre-existing conscious level                    |
| 85115 | Cortex (cerebral) contusion with open intracranial wound, with prolonged [more than 24 hours] loss of consciousness without return to pre-existing conscious level                |
| 85116 | Cortex (cerebral) contusion with open intracranial wound, with loss of consciousness of unspecified duration                                                                      |
| 85119 | Cortex (cerebral) contusion with open intracranial wound, with concussion, unspecified                                                                                            |
| 85120 | Cortex (cerebral) laceration without mention of open intracranial wound, unspecified state of consciousness                                                                       |
| 85121 | Cortex (cerebral) laceration without mention of open intracranial wound, with no loss of consciousness                                                                            |
| 85122 | Cortex (cerebral) laceration without mention of open intracranial wound, with brief [less than one hour] loss of consciousness                                                    |
| 85123 | Cortex (cerebral) laceration without mention of open intracranial wound, with moderate [1-24 hours] loss of consciousness                                                         |
| 85124 | Cortex (cerebral) laceration without mention of open intracranial wound, with prolonged [more than 24 hours] loss of consciousness and return to pre-existing conscious level     |
| 85125 | Cortex (cerebral) laceration without mention of open intracranial wound, with prolonged [more than 24 hours] loss of consciousness without return to pre-existing conscious level |
| 85126 | Cortex (cerebral) laceration without mention of open intracranial wound, with loss of consciousness of unspecified duration                                                       |

|       |                                                                                                                                                                                         |
|-------|-----------------------------------------------------------------------------------------------------------------------------------------------------------------------------------------|
| 85129 | Cortex (cerebral) laceration without mention of open intracranial wound, with concussion, unspecified                                                                                   |
| 85130 | Cortex (cerebral) laceration with open intracranial wound, unspecified state of consciousness                                                                                           |
| 85131 | Cortex (cerebral) laceration with open intracranial wound, with no loss of consciousness                                                                                                |
| 85132 | Cortex (cerebral) laceration with open intracranial wound, with brief [less than one hour] loss of consciousness                                                                        |
| 85133 | Cortex (cerebral) laceration with open intracranial wound, with moderate [1-24 hours] loss of consciousness                                                                             |
| 85134 | Cortex (cerebral) laceration with open intracranial wound, with prolonged [more than 24 hours] loss of consciousness and return to pre-existing conscious level                         |
| 85135 | Cortex (cerebral) laceration with open intracranial wound, with prolonged [more than 24 hours] loss of consciousness without return to pre-existing conscious level                     |
| 85136 | Cortex (cerebral) laceration with open intracranial wound, with loss of consciousness of unspecified duration                                                                           |
| 85139 | Cortex (cerebral) laceration with open intracranial wound, with concussion, unspecified                                                                                                 |
| 85140 | Cerebellar or brain stem contusion without mention of open intracranial wound, unspecified state of consciousness                                                                       |
| 85141 | Cerebellar or brain stem contusion without mention of open intracranial wound, with no loss of consciousness                                                                            |
| 85142 | Cerebellar or brain stem contusion without mention of open intracranial wound, with brief [less than one hour] loss of consciousness                                                    |
| 85143 | Cerebellar or brain stem contusion without mention of open intracranial wound, with moderate [1-24 hours] loss of consciousness                                                         |
| 85144 | Cerebellar or brain stem contusion without mention of open intracranial wound, with prolonged [more than 24 hours] loss consciousness and return to pre-existing conscious level        |
| 85145 | Cerebellar or brain stem contusion without mention of open intracranial wound, with prolonged [more than 24 hours] loss of consciousness without return to pre-existing conscious level |
| 85146 | Cerebellar or brain stem contusion without mention of open intracranial wound, with loss of consciousness of unspecified duration                                                       |
| 85149 | Cerebellar or brain stem contusion without mention of open intracranial wound, with concussion, unspecified                                                                             |
| 85150 | Cerebellar or brain stem contusion with open intracranial wound, unspecified state of consciousness                                                                                     |
| 85151 | Cerebellar or brain stem contusion with open intracranial wound, with no loss of consciousness                                                                                          |
| 85152 | Cerebellar or brain stem contusion with open intracranial wound, with brief [less than one hour] loss of consciousness                                                                  |
| 85153 | Cerebellar or brain stem contusion with open intracranial wound, with moderate [1-24 hours] loss of consciousness                                                                       |
| 85154 | Cerebellar or brain stem contusion with open intracranial wound, with prolonged [more than 24 hours] loss of consciousness and return to pre-existing conscious level                   |

|       |                                                                                                                                                                                          |
|-------|------------------------------------------------------------------------------------------------------------------------------------------------------------------------------------------|
| 85155 | Cerebellar or brain stem contusion with open intracranial wound, with prolonged [more than 24 hours] loss of consciousness without return to pre-existing conscious level                |
| 85156 | Cerebellar or brain stem contusion with open intracranial wound, with loss of consciousness of unspecified duration                                                                      |
| 85159 | Cerebellar or brain stem contusion with open intracranial wound, with concussion, unspecified                                                                                            |
| 85160 | Cerebellar or brain stem laceration without mention of open intracranial wound, unspecified state of consciousness                                                                       |
| 85161 | Cerebellar or brain stem laceration without mention of open intracranial wound, with no loss of consciousness                                                                            |
| 85162 | Cerebellar or brain stem laceration without mention of open intracranial wound, with brief [less than 1 hour] loss of consciousness                                                      |
| 85163 | Cerebellar or brain stem laceration without mention of open intracranial wound, with moderate [1-24 hours] loss of consciousness                                                         |
| 85164 | Cerebellar or brain stem laceration without mention of open intracranial wound, with prolonged [more than 24 hours] loss of consciousness and return to pre-existing conscious level     |
| 85165 | Cerebellar or brain stem laceration without mention of open intracranial wound, with prolonged [more than 24 hours] loss of consciousness without return to pre-existing conscious level |
| 85166 | Cerebellar or brain stem laceration without mention of open intracranial wound, with loss of consciousness of unspecified duration                                                       |
| 85169 | Cerebellar or brain stem laceration without mention of open intracranial wound, with concussion, unspecified                                                                             |
| 85170 | Cerebellar or brain stem laceration with open intracranial wound, unspecified state of consciousness                                                                                     |
| 85171 | Cerebellar or brain stem laceration with open intracranial wound, with no loss of consciousness                                                                                          |
| 85172 | Cerebellar or brain stem laceration with open intracranial wound, with brief [less than one hour] loss of consciousness                                                                  |
| 85173 | Cerebellar or brain stem laceration with open intracranial wound, with moderate [1-24 hours] loss of consciousness                                                                       |
| 85174 | Cerebellar or brain stem laceration with open intracranial wound, with prolonged [more than 24 hours] loss of consciousness and return to pre-existing conscious level                   |
| 85175 | Cerebellar or brain stem laceration with open intracranial wound, with prolonged [more than 24 hours] loss of consciousness without return to pre-existing conscious level               |
| 85176 | Cerebellar or brain stem laceration with open intracranial wound, with loss of consciousness of unspecified duration                                                                     |
| 85179 | Cerebellar or brain stem laceration with open intracranial wound, with concussion, unspecified                                                                                           |
| 85180 | Other and unspecified cerebral laceration and contusion, without mention of open intracranial wound, unspecified state of consciousness                                                  |
| 85181 | Other and unspecified cerebral laceration and contusion, without mention of open intracranial wound, with no loss of consciousness                                                       |
| 85182 | Other and unspecified cerebral laceration and contusion, without mention of open intracranial wound, with brief [less than one hour] loss of consciousness                               |

|       |                                                                                                                                                                                                               |
|-------|---------------------------------------------------------------------------------------------------------------------------------------------------------------------------------------------------------------|
| 85183 | Other and unspecified cerebral laceration and contusion, without mention of open intracranial wound, with moderate [1-24 hours] loss of consciousness                                                         |
| 85184 | Other and unspecified cerebral laceration and contusion, without mention of open intracranial wound, with prolonged [more than 24 hours] loss of consciousness and return to pre-existing conscious level     |
| 85185 | Other and unspecified cerebral laceration and contusion, without mention of open intracranial wound, with prolonged [more than 24 hours] loss of consciousness without return to pre-existing conscious level |
| 85186 | Other and unspecified cerebral laceration and contusion, without mention of open intracranial wound, with loss of consciousness of unspecified duration                                                       |
| 85189 | Other and unspecified cerebral laceration and contusion, without mention of open intracranial wound, with concussion, unspecified                                                                             |
| 85190 | Other and unspecified cerebral laceration and contusion, with open intracranial wound, unspecified state of consciousness                                                                                     |
| 85191 | Other and unspecified cerebral laceration and contusion, with open intracranial wound, with no loss of consciousness                                                                                          |
| 85192 | Other and unspecified cerebral laceration and contusion, with open intracranial wound, with brief [less than one hour] loss of consciousness                                                                  |
| 85193 | Other and unspecified cerebral laceration and contusion, with open intracranial wound, with moderate [1-24 hours] loss of consciousness                                                                       |
| 85194 | Other and unspecified cerebral laceration and contusion, with open intracranial wound, with prolonged [more than 24 hours] loss of consciousness and return to pre-existing conscious level                   |
| 85195 | Other and unspecified cerebral laceration and contusion, with open intracranial wound, with prolonged [more than 24 hours] loss of consciousness without return to pre-existing conscious level               |
| 85196 | Other and unspecified cerebral laceration and contusion, with open intracranial wound, with loss of consciousness of unspecified duration                                                                     |
| 85199 | Other and unspecified cerebral laceration and contusion, with open intracranial wound, with concussion, unspecified                                                                                           |
| 85200 | Subarachnoid hemorrhage following injury without mention of open intracranial wound, unspecified state of consciousness                                                                                       |
| 85201 | Subarachnoid hemorrhage following injury without mention of open intracranial wound, with no loss of consciousness                                                                                            |
| 85202 | Subarachnoid hemorrhage following injury without mention of open intracranial wound, with brief [less than one hour] loss of consciousness                                                                    |
| 85203 | Subarachnoid hemorrhage following injury without mention of open intracranial wound, with moderate [1-24 hours] loss of consciousness                                                                         |
| 85204 | Subarachnoid hemorrhage following injury without mention of open intracranial wound, with prolonged [more than 24 hours] loss of consciousness and return to pre-existing conscious level                     |
| 85205 | Subarachnoid hemorrhage following injury without mention of open intracranial wound, with prolonged [more than 24 hours] loss of consciousness without return to pre-existing conscious level                 |
| 85206 | Subarachnoid hemorrhage following injury without mention of open intracranial wound, with loss of consciousness of unspecified duration                                                                       |

|       |                                                                                                                                                                                           |
|-------|-------------------------------------------------------------------------------------------------------------------------------------------------------------------------------------------|
| 85209 | Subarachnoid hemorrhage following injury without mention of open intracranial wound, with concussion, unspecified                                                                         |
| 85210 | Subarachnoid hemorrhage following injury with open intracranial wound, unspecified state of consciousness                                                                                 |
| 85211 | Subarachnoid hemorrhage following injury with open intracranial wound, with no loss of consciousness                                                                                      |
| 85212 | Subarachnoid hemorrhage following injury with open intracranial wound, with brief [less than one hour] loss of consciousness                                                              |
| 85213 | Subarachnoid hemorrhage following injury with open intracranial wound, with moderate [1-24 hours] loss of consciousness                                                                   |
| 85214 | Subarachnoid hemorrhage following injury with open intracranial wound, with prolonged [more than 24 hours] loss of consciousness and return to pre-existing conscious level               |
| 85215 | Subarachnoid hemorrhage following injury with open intracranial wound, with prolonged [more than 24 hours] loss of consciousness without return to pre-existing conscious level           |
| 85216 | Subarachnoid hemorrhage following injury with open intracranial wound, with loss of consciousness of unspecified duration                                                                 |
| 85219 | Subarachnoid hemorrhage following injury with open intracranial wound, with concussion, unspecified                                                                                       |
| 85220 | Subdural hemorrhage following injury without mention of open intracranial wound, unspecified state of consciousness                                                                       |
| 85221 | Subdural hemorrhage following injury without mention of open intracranial wound, with no loss of consciousness                                                                            |
| 85222 | Subdural hemorrhage following injury without mention of open intracranial wound, with brief [less than one hour] loss of consciousness                                                    |
| 85223 | Subdural hemorrhage following injury without mention of open intracranial wound, with moderate [1-24 hours] loss of consciousness                                                         |
| 85224 | Subdural hemorrhage following injury without mention of open intracranial wound, with prolonged [more than 24 hours] loss of consciousness and return to pre-existing conscious level     |
| 85225 | Subdural hemorrhage following injury without mention of open intracranial wound, with prolonged [more than 24 hours] loss of consciousness without return to pre-existing conscious level |
| 85226 | Subdural hemorrhage following injury without mention of open intracranial wound, with loss of consciousness of unspecified duration                                                       |
| 85229 | Subdural hemorrhage following injury without mention of open intracranial wound, with concussion, unspecified                                                                             |
| 85230 | Subdural hemorrhage following injury with open intracranial wound, unspecified state of consciousness                                                                                     |
| 85231 | Subdural hemorrhage following injury with open intracranial wound, with no loss of consciousness                                                                                          |
| 85232 | Subdural hemorrhage following injury with open intracranial wound, with brief [less than one hour] loss of consciousness                                                                  |
| 85233 | Subdural hemorrhage following injury with open intracranial wound, with moderate [1-24 hours] loss of consciousness                                                                       |
| 85234 | Subdural hemorrhage following injury with open intracranial wound, with prolonged [more than 24 hours] loss of consciousness and return to pre-existing conscious level                   |

|       |                                                                                                                                                                                             |
|-------|---------------------------------------------------------------------------------------------------------------------------------------------------------------------------------------------|
| 85235 | Subdural hemorrhage following injury with open intracranial wound, with prolonged [more than 24 hours] loss of consciousness without return to pre-existing conscious level                 |
| 85236 | Subdural hemorrhage following injury with open intracranial wound, with loss of consciousness of unspecified duration                                                                       |
| 85239 | Subdural hemorrhage following injury with open intracranial wound, with concussion, unspecified                                                                                             |
| 85240 | Extradural hemorrhage following injury without mention of open intracranial wound, unspecified state of consciousness                                                                       |
| 85241 | Extradural hemorrhage following injury without mention of open intracranial wound, with no loss of consciousness                                                                            |
| 85242 | Extradural hemorrhage following injury without mention of open intracranial wound, with brief [less than 1 hour] loss of consciousness                                                      |
| 85243 | Extradural hemorrhage following injury without mention of open intracranial wound, with moderate [1-24 hours] loss of consciousness                                                         |
| 85244 | Extradural hemorrhage following injury without mention of open intracranial wound, with prolonged [more than 24 hours] loss of consciousness and return to pre-existing conscious level     |
| 85245 | Extradural hemorrhage following injury without mention of open intracranial wound, with prolonged [more than 24 hours] loss of consciousness without return to pre-existing conscious level |
| 85246 | Extradural hemorrhage following injury without mention of open intracranial wound, with loss of consciousness of unspecified duration                                                       |
| 85249 | Extradural hemorrhage following injury without mention of open intracranial wound, with concussion, unspecified                                                                             |
| 85250 | Extradural hemorrhage following injury with open intracranial wound, unspecified state of consciousness                                                                                     |
| 85251 | Extradural hemorrhage following injury with open intracranial wound, with no loss of consciousness                                                                                          |
| 85252 | Extradural hemorrhage following injury with open intracranial wound, with brief [less than one hour] loss of consciousness                                                                  |
| 85253 | Extradural hemorrhage following injury with open intracranial wound, with moderate [1-24 hours] loss of consciousness                                                                       |
| 85254 | Extradural hemorrhage following injury with open intracranial wound, with prolonged [more than 24 hours] loss of consciousness and return to pre-existing conscious level                   |
| 85255 | Extradural hemorrhage following injury with open intracranial wound, with prolonged [more than 24 hours] loss of consciousness without return to pre-existing conscious level               |
| 85256 | Extradural hemorrhage following injury with open intracranial wound, with loss of consciousness of unspecified duration                                                                     |
| 85259 | Extradural hemorrhage following injury with open intracranial wound, with concussion, unspecified                                                                                           |
| 85300 | Other and unspecified intracranial hemorrhage following injury without mention of open intracranial wound, unspecified state of consciousness                                               |
| 85301 | Other and unspecified intracranial hemorrhage following injury without mention of open intracranial wound, with no loss of consciousness                                                    |
| 85302 | Other and unspecified intracranial hemorrhage following injury without mention of open intracranial wound, with brief [less than one hour] loss of consciousness                            |

|       |                                                                                                                                                                                                                     |
|-------|---------------------------------------------------------------------------------------------------------------------------------------------------------------------------------------------------------------------|
| 85303 | Other and unspecified intracranial hemorrhage following injury without mention of open intracranial wound, with moderate [1-24 hours] loss of consciousness                                                         |
| 85304 | Other and unspecified intracranial hemorrhage following injury without mention of open intracranial wound, with prolonged [more than 24 hours] loss of consciousness and return to pre- existing conscious level    |
| 85305 | Other and unspecified intracranial hemorrhage following injury without mention of open intracranial wound, with prolonged [more than 24 hours] loss of consciousness without return to pre-existing conscious level |
| 85306 | Other and unspecified intracranial hemorrhage following injury without mention of open intracranial wound, with loss of consciousness of unspecified duration                                                       |
| 85309 | Other and unspecified intracranial hemorrhage following injury without mention of open intracranial wound, with concussion, unspecified                                                                             |
| 85310 | Other and unspecified intracranial hemorrhage following injury with open intracranial wound, unspecified state of consciousness                                                                                     |
| 85311 | Other and unspecified intracranial hemorrhage following injury with open intracranial wound, with no loss of consciousness                                                                                          |
| 85312 | Other and unspecified intracranial hemorrhage following injury with open intracranial wound, with brief [less than one hour] loss of consciousness                                                                  |
| 85313 | Other and unspecified intracranial hemorrhage following injury with open intracranial wound, with moderate [1-24 hours] loss of consciousness                                                                       |
| 85314 | Other and unspecified intracranial hemorrhage following injury with open intracranial wound, with prolonged [more than 24 hours] loss of consciousness and return to pre-existing conscious level                   |
| 85315 | Other and unspecified intracranial hemorrhage following injury with open intracranial wound, with prolonged [more than 24 hours] loss of consciousness without return to pre-existing conscious level               |
| 85316 | Other and unspecified intracranial hemorrhage following injury with open intracranial wound, with loss of consciousness of unspecified duration                                                                     |
| 85319 | Other and unspecified intracranial hemorrhage following injury with open intracranial wound, with concussion, unspecified                                                                                           |
| 85400 | Intracranial injury of other and unspecified nature without mention of open intracranial wound, unspecified state of consciousness                                                                                  |
| 85401 | Intracranial injury of other and unspecified nature without mention of open intracranial wound, with no loss of consciousness                                                                                       |
| 85402 | Intracranial injury of other and unspecified nature without mention of open intracranial wound, with brief [less than one hour] loss of consciousness                                                               |
| 85403 | Intracranial injury of other and unspecified nature without mention of open intracranial wound, with moderate [1-24 hours] loss of consciousness                                                                    |
| 85404 | Intracranial injury of other and unspecified nature without mention of open intracranial wound, with prolonged [more than 24 hours] loss of consciousness and return to pre-existing conscious level                |
| 85405 | Intracranial injury of other and unspecified nature without mention of open intracranial wound, with prolonged [more than 24 hours] loss of consciousness without return to pre-existing conscious level            |
| 85406 | Intracranial injury of other and unspecified nature without mention of open intracranial wound, with loss of consciousness of unspecified duration                                                                  |



|       |                                                                                                                                                                                            |
|-------|--------------------------------------------------------------------------------------------------------------------------------------------------------------------------------------------|
| 85409 | Intracranial injury of other and unspecified nature without mention of open intracranial wound, with concussion, unspecified                                                               |
| 85410 | Intracranial injury of other and unspecified nature with open intracranial wound, unspecified state of consciousness                                                                       |
| 85411 | Intracranial injury of other and unspecified nature with open intracranial wound, with no loss of consciousness                                                                            |
| 85412 | Intracranial injury of other and unspecified nature with open intracranial wound, with brief [less than one hour] loss of consciousness                                                    |
| 85413 | Intracranial injury of other and unspecified nature with open intracranial wound, with moderate [1-24 hours] loss of consciousness                                                         |
| 85414 | Intracranial injury of other and unspecified nature with open intracranial wound, with prolonged [more than 24 hours] loss of consciousness and return to pre-existing conscious level     |
| 85415 | Intracranial injury of other and unspecified nature with open intracranial wound, with prolonged [more than 24 hours] loss of consciousness without return to pre-existing conscious level |
| 85416 | Intracranial injury of other and unspecified nature with open intracranial wound, with loss of consciousness of unspecified duration                                                       |
| 85419 | Intracranial injury of other and unspecified nature with open intracranial wound, with concussion, unspecified                                                                             |
| 99555 | Shaken baby syndrome                                                                                                                                                                       |

#### ICD 10 codes SWD

|       |                                                                                     |
|-------|-------------------------------------------------------------------------------------|
| F5101 | Primary insomnia                                                                    |
| F5101 | Adjustment insomnia                                                                 |
| F5103 | Paradoxical insomnia                                                                |
| F5104 | Psychophysiological insomnia                                                        |
| F5105 | Insomnia due to other mental disorder                                               |
| F5109 | Other insomnia not due to a substance or known physiological condition              |
| F5111 | Primary hypersomnia                                                                 |
| F5112 | Insufficient sleep syndrome                                                         |
| F5113 | Hypersomnia due to other mental disorder                                            |
| F5119 | Other hypersomnia not due to a substance or known physiological condition           |
| F513  | Sleepwalking (somnambulism)                                                         |
| F514  | Sleep terrors (night terrors)                                                       |
| F515  | Nightmare disorder                                                                  |
| F518  | Other sleep disorders not due to a substances or known physiological condition      |
| F519  | Sleep disorder not due to a substance or known physiological condition, unspecified |
| G4700 | Insomnia, unspecified                                                               |
| G4709 | Other insomnia                                                                      |
| G4711 | Idiopathic hypersomnia with long sleep time                                         |
| G4712 | Idiopathic hypersomnia without a long sleep time                                    |

|        |                                                                    |
|--------|--------------------------------------------------------------------|
| G4713  | Recurrent hypersomnia                                              |
| G4714  | Other hypersomnia due to medical condition                         |
| G4719  | Other hypersomnia                                                  |
| G4720  | Circadian rhythm sleep disorder, unspecified type                  |
| G4721  | Circadian rhythm sleep disorder, delayed sleep phase type          |
| G4722  | Circadian rhythm sleep disorder, advanced sleep phase type         |
| G4723  | Circadian rhythm sleep disorder, irregular sleep wake type         |
| G4724  | Circadian rhythm sleep disorder, free running type                 |
| G4725  | Circadian rhythm sleep disorder, jet lag type                      |
| G4726  | Circadian rhythm sleep disorder, shift work type                   |
| G4727  | Circadian rhythm sleep disorder in conditions classified elsewhere |
| G4729  | Other circadian rhythm sleep disorder                              |
| G4730  | Sleep apnea, unspecified                                           |
| G4731  | Primary central sleep apnea                                        |
| G4732  | High altitude periodic breathing                                   |
| G4733  | Obstructive sleep apnea (adult) (pediatric)                        |
| G4734  | Idiopathic sleep related nonobstructive alveolar hypoventilation   |
| G4735  | Congenital central alveolar hypoventilation syndrome               |
| G4736  | Sleep related hypoventilation in conditions classified elsewhere   |
| G4737  | Central sleep apnea in conditions classified elsewhere             |
| G4739  | Other sleep apnea                                                  |
| G47411 | Narcolepsy with cataplexy                                          |
| G47419 | Narcolepsy without cataplexy                                       |
| G47421 | Narcolepsy in conditions classified elsewhere with cataplexy       |
| G47429 | Narcolepsy in conditions classified elsewhere without cataplexy    |
| G4750  | Parasomnia, unspecified                                            |
| G4751  | Confusional arousals                                               |
| G4752  | REM sleep behavior disorder                                        |
| G4753  | Recurrent isolated sleep paralysis                                 |
| G4754  | Parasomnia in conditions classified elsewhere                      |
| G4759  | Other parasomnia                                                   |
| G4761  | Periodic limb movement disorder                                    |
| G4762  | Sleep related leg cramps                                           |
| G4763  | Sleep related bruxism                                              |
| G4769  | Other sleep related movement disorders                             |
| G478   | Other sleep disorders                                              |
| G479   | disorder, unspecified                                              |

#### ICD 10 Codes TBI

|         |                                                |
|---------|------------------------------------------------|
| R4020   | Unspecified coma                               |
| R402110 | Coma scale, eyes open, never, unspecified time |

|         |                                                                                                     |
|---------|-----------------------------------------------------------------------------------------------------|
| R402111 | Coma scale, eyes open, never, in the field [EMT or ambulance]                                       |
| R402112 | Coma scale, eyes open, never, at arrival to emergency department                                    |
| R402113 | Coma scale, eyes open, never, at hospital admission                                                 |
| R402114 | Coma scale, eyes open, never, 24 hours or more after hospital admission                             |
| R402120 | Coma scale, eyes open, to pain, unspecified time                                                    |
| R402121 | Coma scale, eyes open, to pain, in the field [EMT or ambulance]                                     |
| R402122 | Coma scale, eyes open, to pain, at arrival to emergency department                                  |
| R402123 | Coma scale, eyes open, to pain, at hospital admission                                               |
| R402124 | Coma scale, eyes open, to pain, 24 hours or more after hospital admission                           |
| R402130 | Coma scale, eyes open, to sound, unspecified time                                                   |
| R402131 | Coma scale, eyes open, to sound, in the field [EMT or ambulance]                                    |
| R402132 | Coma scale, eyes open, to sound, at arrival to emergency department                                 |
| R402133 | Coma scale, eyes open, to sound, at hospital admission                                              |
| R402134 | Coma scale, eyes open, to sound, 24 hours or more after hospital admission                          |
| R402140 | Coma scale, eyes open, spontaneous, unspecified time                                                |
| R402141 | Coma scale, eyes open, spontaneous, in the field [EMT or ambulance]                                 |
| R402142 | Coma scale, eyes open, spontaneous, at arrival to emergency department                              |
| R402143 | Coma scale, eyes open, spontaneous, at hospital admission                                           |
| R402144 | Coma scale, eyes open, spontaneous, 24 hours or more after hospital admission                       |
| R402210 | Coma scale, best verbal response, none, unspecified time                                            |
| R402211 | Coma scale, best verbal response, none, in the field [EMT or ambulance]                             |
| R402212 | Coma scale, best verbal response, none, at arrival to emergency department                          |
| R402213 | Coma scale, best verbal response, none, at hospital admission                                       |
| R402214 | Coma scale, best verbal response, none, 24 hours or more after hospital admission                   |
| R402220 | Coma scale, best verbal response, incomprehensible words, unspecified time                          |
| R402221 | Coma scale, best verbal response, incomprehensible words, in the field [EMT or ambulance]           |
| R402222 | Coma scale, best verbal response, incomprehensible words, at arrival to emergency department        |
| R402223 | Coma scale, best verbal response, incomprehensible words, at hospital admission                     |
| R402224 | Coma scale, best verbal response, incomprehensible words, 24 hours or more after hospital admission |
| R402230 | Coma scale, best verbal response, inappropriate words, unspecified time                             |
| R402231 | Coma scale, best verbal response, inappropriate words, in the field [EMT or ambulance]              |
| R402232 | Coma scale, best verbal response, inappropriate words, at arrival to emergency department           |
| R402233 | Coma scale, best verbal response, inappropriate words, at hospital admission                        |
| R402234 | Coma scale, best verbal response, inappropriate words, 24 hours or more after hospital admission    |
| R402240 | Coma scale, best verbal response, confused conversation, unspecified time                           |
| R402241 | Coma scale, best verbal response, confused conversation, in the field [EMT or ambulance]            |
| R402242 | Coma scale, best verbal response, confused conversation, at arrival to emergency department         |

|         |                                                                                                    |
|---------|----------------------------------------------------------------------------------------------------|
| R402243 | Coma scale, best verbal response, confused conversation, at hospital admission                     |
| R402244 | Coma scale, best verbal response, confused conversation, 24 hours or more after hospital admission |
| R402250 | Coma scale, best verbal response, oriented, unspecified time                                       |
| R402251 | Coma scale, best verbal response, oriented, in the field [EMT or ambulance]                        |
| R402252 | Coma scale, best verbal response, oriented, at arrival to emergency department                     |
| R402253 | Coma scale, best verbal response, oriented, at hospital admission                                  |
| R402254 | Coma scale, best verbal response, oriented, 24 hours or more after hospital admission              |
| R402310 | Coma scale, best motor response, none, unspecified time                                            |
| R402311 | Coma scale, best motor response, none, in the field [EMT or ambulance]                             |
| R402312 | Coma scale, best motor response, none, at arrival to emergency department                          |
| R402313 | Coma scale, best motor response, none, at hospital admission                                       |
| R402314 | Coma scale, best motor response, none, 24 hours or more after hospital admission                   |
| R402320 | Coma scale, best motor response, extension, unspecified time                                       |
| R402321 | Coma scale, best motor response, extension, in the field [EMT or ambulance]                        |
| R402322 | Coma scale, best motor response, extension, at arrival to emergency department                     |
| R402323 | Coma scale, best motor response, extension, at hospital admission                                  |
| R402324 | Coma scale, best motor response, extension, 24 hours or more after hospital admission              |
| R402330 | Coma scale, best motor response, abnormal flexion, unspecified time                                |
| R402331 | Coma scale, best motor response, abnormal flexion, in the field [EMT or ambulance]                 |
| R402332 | Coma scale, best motor response, abnormal flexion, at arrival to emergency department              |
| R402333 | Coma scale, best motor response, abnormal flexion, at hospital admission                           |
| R402334 | Coma scale, best motor response, abnormal flexion, 24 hours or more after hospital admission       |
| R402340 | Coma scale, best motor response, flexion withdrawal, unspecified time                              |
| R402341 | Coma scale, best motor response, flexion withdrawal, in the field [EMT or ambulance]               |
| R402342 | Coma scale, best motor response, flexion withdrawal, at arrival to emergency department            |
| R402343 | Coma scale, best motor response, flexion withdrawal, at hospital admission                         |
| R402344 | Coma scale, best motor response, flexion withdrawal, 24 hours or more after hospital admission     |
| R402350 | Coma scale, best motor response, localizes pain, unspecified time                                  |
| R402351 | Coma scale, best motor response, localizes pain, in the field [EMT or ambulance]                   |
| R402352 | Coma scale, best motor response, localizes pain, at arrival to emergency department                |
| R402353 | Coma scale, best motor response, localizes pain, at hospital admission                             |
| R402354 | Coma scale, best motor response, localizes pain, 24 hours or more after hospital admission         |
| R402360 | Coma scale, best motor response, obeys commands, unspecified time                                  |
| R402361 | Coma scale, best motor response, obeys commands, in the field [EMT or ambulance]                   |
| R402362 | Coma scale, best motor response, obeys commands, at arrival to emergency department                |
| R402363 | Coma scale, best motor response, obeys commands, at hospital admission                             |
| R402364 | Coma scale, best motor response, obeys commands, 24 hours or more after hospital admission         |
| R402410 | Glasgow coma scale score 13-15, unspecified time                                                   |

|         |                                                                                                                                    |
|---------|------------------------------------------------------------------------------------------------------------------------------------|
| R402411 | Glasgow coma scale score 13-15, in the field [EMT or ambulance]                                                                    |
| R402412 | Glasgow coma scale score 13-15, at arrival to emergency department                                                                 |
| R402413 | Glasgow coma scale score 13-15, at hospital admission                                                                              |
| R402414 | Glasgow coma scale score 13-15, 24 hours or more after hospital admission                                                          |
| R402420 | Glasgow coma scale score 9-12, unspecified time                                                                                    |
| R402421 | Glasgow coma scale score 9-12, in the field [EMT or ambulance]                                                                     |
| R402422 | Glasgow coma scale score 9-12, at arrival to emergency department                                                                  |
| R402423 | Glasgow coma scale score 9-12, at hospital admission                                                                               |
| R402424 | Glasgow coma scale score 9-12, 24 hours or more after hospital admission                                                           |
| R402430 | Glasgow coma scale score 3-8, unspecified time                                                                                     |
| R402431 | Glasgow coma scale score 3-8, in the field [EMT or ambulance]                                                                      |
| R402432 | Glasgow coma scale score 3-8, at arrival to emergency department                                                                   |
| R402433 | Glasgow coma scale score 3-8, at hospital admission                                                                                |
| R402434 | Glasgow coma scale score 3-8, 24 hours or more after hospital admission                                                            |
| R402440 | Other coma, without documented Glasgow coma scale score, or with partial score reported, unspecified time                          |
| R402441 | Other coma, without documented Glasgow coma scale score, or with partial score reported, in the field [EMT or ambulance]           |
| R402442 | Other coma, without documented Glasgow coma scale score, or with partial score reported, at arrival to emergency department        |
| R402443 | Other coma, without documented Glasgow coma scale score, or with partial score reported, at hospital admission                     |
| R402444 | Other coma, without documented Glasgow coma scale score, or with partial score reported, 24 hours or more after hospital admission |
| S060X0A | Concussion without loss of consciousness, initial encounter                                                                        |
| S060X0D | Concussion without loss of consciousness, subsequent encounter                                                                     |
| S060X0S | Concussion without loss of consciousness, sequela                                                                                  |
| S060X1A | Concussion with loss of consciousness of 30 minutes or less, initial encounter                                                     |
| S060X1D | Concussion with loss of consciousness of 30 minutes or less, subsequent encounter                                                  |
| S060X1S | Concussion with loss of consciousness of 30 minutes or less, sequela                                                               |
| S060X9A | Concussion with loss of consciousness of unspecified duration, initial encounter                                                   |
| S060X9D | Concussion with loss of consciousness of unspecified duration, subsequent encounter                                                |
| S060X9S | Concussion with loss of consciousness of unspecified duration, sequela                                                             |
| S061X0A | Traumatic cerebral edema without loss of consciousness, initial encounter                                                          |
| S061X0D | Traumatic cerebral edema without loss of consciousness, subsequent encounter                                                       |
| S061X0S | Traumatic cerebral edema without loss of consciousness, sequela                                                                    |
| S061X1A | Traumatic cerebral edema with loss of consciousness of 30 minutes or less, initial encounter                                       |
| S061X1D | Traumatic cerebral edema with loss of consciousness of 30 minutes or less, subsequent encounter                                    |
| S061X1S | Traumatic cerebral edema with loss of consciousness of 30 minutes or less, sequela                                                 |

|         |                                                                                                                                                                       |
|---------|-----------------------------------------------------------------------------------------------------------------------------------------------------------------------|
| S061X2A | Traumatic cerebral edema with loss of consciousness of 31 minutes to 59 minutes, initial encounter                                                                    |
| S061X2D | Traumatic cerebral edema with loss of consciousness of 31 minutes to 59 minutes, subsequent encounter                                                                 |
| S061X2S | Traumatic cerebral edema with loss of consciousness of 31 minutes to 59 minutes, sequela                                                                              |
| S061X3A | Traumatic cerebral edema with loss of consciousness of 1 hour to 5 hours 59 minutes, initial encounter                                                                |
| S061X3D | Traumatic cerebral edema with loss of consciousness of 1 hour to 5 hours 59 minutes, subsequent encounter                                                             |
| S061X3S | Traumatic cerebral edema with loss of consciousness of 1 hour to 5 hours 59 minutes, sequela                                                                          |
| S061X4A | Traumatic cerebral edema with loss of consciousness of 6 hours to 24 hours, initial encounter                                                                         |
| S061X4D | Traumatic cerebral edema with loss of consciousness of 6 hours to 24 hours, subsequent encounter                                                                      |
| S061X4S | Traumatic cerebral edema with loss of consciousness of 6 hours to 24 hours, sequela                                                                                   |
| S061X5A | Traumatic cerebral edema with loss of consciousness greater than 24 hours with return to pre-existing conscious level, initial encounter                              |
| S061X5D | Traumatic cerebral edema with loss of consciousness greater than 24 hours with return to pre-existing conscious level, subsequent encounter                           |
| S061X5S | Traumatic cerebral edema with loss of consciousness greater than 24 hours with return to pre-existing conscious level, sequela                                        |
| S061X6A | Traumatic cerebral edema with loss of consciousness greater than 24 hours without return to pre-existing conscious level with patient surviving, initial encounter    |
| S061X6D | Traumatic cerebral edema with loss of consciousness greater than 24 hours without return to pre-existing conscious level with patient surviving, subsequent encounter |
| S061X6S | Traumatic cerebral edema with loss of consciousness greater than 24 hours without return to pre-existing conscious level with patient surviving, sequela              |
| S061X7A | Traumatic cerebral edema with loss of consciousness of any duration with death due to brain injury prior to regaining consciousness, initial encounter                |
| S061X8A | Traumatic cerebral edema with loss of consciousness of any duration with death due to other cause prior to regaining consciousness, initial encounter                 |
| S061X9A | Traumatic cerebral edema with loss of consciousness of unspecified duration, initial encounter                                                                        |
| S061X9D | Traumatic cerebral edema with loss of consciousness of unspecified duration, subsequent encounter                                                                     |
| S061X9S | Traumatic cerebral edema with loss of consciousness of unspecified duration, sequela                                                                                  |
| S062X0A | Diffuse traumatic brain injury without loss of consciousness, initial encounter                                                                                       |
| S062X0D | Diffuse traumatic brain injury without loss of consciousness, subsequent encounter                                                                                    |
| S062X0S | Diffuse traumatic brain injury without loss of consciousness, sequela                                                                                                 |
| S062X1A | Diffuse traumatic brain injury with loss of consciousness of 30 minutes or less, initial encounter                                                                    |
| S062X1D | Diffuse traumatic brain injury with loss of consciousness of 30 minutes or less, subsequent encounter                                                                 |
| S062X1S | Diffuse traumatic brain injury with loss of consciousness of 30 minutes or less, sequela                                                                              |

|         |                                                                                                                                                                             |
|---------|-----------------------------------------------------------------------------------------------------------------------------------------------------------------------------|
| S062X2A | Diffuse traumatic brain injury with loss of consciousness of 31 minutes to 59 minutes, initial encounter                                                                    |
| S062X2D | Diffuse traumatic brain injury with loss of consciousness of 31 minutes to 59 minutes, subsequent encounter                                                                 |
| S062X2S | Diffuse traumatic brain injury with loss of consciousness of 31 minutes to 59 minutes, sequela                                                                              |
| S062X3A | Diffuse traumatic brain injury with loss of consciousness of 1 hour to 5 hours 59 minutes, initial encounter                                                                |
| S062X3D | Diffuse traumatic brain injury with loss of consciousness of 1 hour to 5 hours 59 minutes, subsequent encounter                                                             |
| S062X3S | Diffuse traumatic brain injury with loss of consciousness of 1 hour to 5 hours 59 minutes, sequela                                                                          |
| S062X4A | Diffuse traumatic brain injury with loss of consciousness of 6 hours to 24 hours, initial encounter                                                                         |
| S062X4D | Diffuse traumatic brain injury with loss of consciousness of 6 hours to 24 hours, subsequent encounter                                                                      |
| S062X4S | Diffuse traumatic brain injury with loss of consciousness of 6 hours to 24 hours, sequela                                                                                   |
| S062X5A | Diffuse traumatic brain injury with loss of consciousness greater than 24 hours with return to pre-existing conscious levels, initial encounter                             |
| S062X5D | Diffuse traumatic brain injury with loss of consciousness greater than 24 hours with return to pre-existing conscious levels, subsequent encounter                          |
| S062X5S | Diffuse traumatic brain injury with loss of consciousness greater than 24 hours with return to pre-existing conscious levels, sequela                                       |
| S062X6A | Diffuse traumatic brain injury with loss of consciousness greater than 24 hours without return to pre-existing conscious level with patient surviving, initial encounter    |
| S062X6D | Diffuse traumatic brain injury with loss of consciousness greater than 24 hours without return to pre-existing conscious level with patient surviving, subsequent encounter |
| S062X6S | Diffuse traumatic brain injury with loss of consciousness greater than 24 hours without return to pre-existing conscious level with patient surviving, sequela              |
| S062X7A | Diffuse traumatic brain injury with loss of consciousness of any duration with death due to brain injury prior to regaining consciousness, initial encounter                |
| S062X8A | Diffuse traumatic brain injury with loss of consciousness of any duration with death due to other cause prior to regaining consciousness, initial encounter                 |
| S062X9A | Diffuse traumatic brain injury with loss of consciousness of unspecified duration, initial encounter                                                                        |
| S062X9D | Diffuse traumatic brain injury with loss of consciousness of unspecified duration, subsequent encounter                                                                     |
| S062X9S | Diffuse traumatic brain injury with loss of consciousness of unspecified duration, sequela                                                                                  |
| S06300A | Unspecified focal traumatic brain injury without loss of consciousness, initial encounter                                                                                   |
| S06300D | Unspecified focal traumatic brain injury without loss of consciousness, subsequent encounter                                                                                |
| S06300S | Unspecified focal traumatic brain injury without loss of consciousness, sequela                                                                                             |
| S06301A | Unspecified focal traumatic brain injury with loss of consciousness of 30 minutes or less, initial encounter                                                                |

|         |                                                                                                                                                                                       |
|---------|---------------------------------------------------------------------------------------------------------------------------------------------------------------------------------------|
| S06301D | Unspecified focal traumatic brain injury with loss of consciousness of 30 minutes or less, subsequent encounter                                                                       |
| S06301S | Unspecified focal traumatic brain injury with loss of consciousness of 30 minutes or less, sequela                                                                                    |
| S06302A | Unspecified focal traumatic brain injury with loss of consciousness of 31 minutes to 59 minutes, initial encounter                                                                    |
| S06302D | Unspecified focal traumatic brain injury with loss of consciousness of 31 minutes to 59 minutes, subsequent encounter                                                                 |
| S06302S | Unspecified focal traumatic brain injury with loss of consciousness of 31 minutes to 59 minutes, sequela                                                                              |
| S06303A | Unspecified focal traumatic brain injury with loss of consciousness of 1 hour to 5 hours 59 minutes, initial encounter                                                                |
| S06303D | Unspecified focal traumatic brain injury with loss of consciousness of 1 hour to 5 hours 59 minutes, subsequent encounter                                                             |
| S06303S | Unspecified focal traumatic brain injury with loss of consciousness of 1 hour to 5 hours 59 minutes, sequela                                                                          |
| S06304A | Unspecified focal traumatic brain injury with loss of consciousness of 6 hours to 24 hours, initial encounter                                                                         |
| S06304D | Unspecified focal traumatic brain injury with loss of consciousness of 6 hours to 24 hours, subsequent encounter                                                                      |
| S06304S | Unspecified focal traumatic brain injury with loss of consciousness of 6 hours to 24 hours, sequela                                                                                   |
| S06305A | Unspecified focal traumatic brain injury with loss of consciousness greater than 24 hours with return to pre-existing conscious level, initial encounter                              |
| S06305D | Unspecified focal traumatic brain injury with loss of consciousness greater than 24 hours with return to pre-existing conscious level, subsequent encounter                           |
| S06305S | Unspecified focal traumatic brain injury with loss of consciousness greater than 24 hours with return to pre-existing conscious level, sequela                                        |
| S06306A | Unspecified focal traumatic brain injury with loss of consciousness greater than 24 hours without return to pre-existing conscious level with patient surviving, initial encounter    |
| S06306D | Unspecified focal traumatic brain injury with loss of consciousness greater than 24 hours without return to pre-existing conscious level with patient surviving, subsequent encounter |
| S06306S | Unspecified focal traumatic brain injury with loss of consciousness greater than 24 hours without return to pre-existing conscious level with patient surviving, sequela              |
| S06307A | Unspecified focal traumatic brain injury with loss of consciousness of any duration with death due to brain injury prior to regaining consciousness, initial encounter                |
| S06308A | Unspecified focal traumatic brain injury with loss of consciousness of any duration with death due to other cause prior to regaining consciousness, initial encounter                 |
| S06309A | Unspecified focal traumatic brain injury with loss of consciousness of unspecified duration, initial encounter                                                                        |
| S06309D | Unspecified focal traumatic brain injury with loss of consciousness of unspecified duration, subsequent encounter                                                                     |
| S06309S | Unspecified focal traumatic brain injury with loss of consciousness of unspecified duration, sequela                                                                                  |
| S06310A | Contusion and laceration of right cerebrum without loss of consciousness, initial encounter                                                                                           |



|         |                                                                                                                                                                                         |
|---------|-----------------------------------------------------------------------------------------------------------------------------------------------------------------------------------------|
| S06310D | Contusion and laceration of right cerebrum without loss of consciousness, subsequent encounter                                                                                          |
| S06310S | Contusion and laceration of right cerebrum without loss of consciousness, sequela                                                                                                       |
| S06311A | Contusion and laceration of right cerebrum with loss of consciousness of 30 minutes or less, initial encounter                                                                          |
| S06311D | Contusion and laceration of right cerebrum with loss of consciousness of 30 minutes or less, subsequent encounter                                                                       |
| S06311S | Contusion and laceration of right cerebrum with loss of consciousness of 30 minutes or less, sequela                                                                                    |
| S06312A | Contusion and laceration of right cerebrum with loss of consciousness of 31 minutes to 59 minutes, initial encounter                                                                    |
| S06312D | Contusion and laceration of right cerebrum with loss of consciousness of 31 minutes to 59 minutes, subsequent encounter                                                                 |
| S06312S | Contusion and laceration of right cerebrum with loss of consciousness of 31 minutes to 59 minutes, sequela                                                                              |
| S06313A | Contusion and laceration of right cerebrum with loss of consciousness of 1 hour to 5 hours 59 minutes, initial encounter                                                                |
| S06313D | Contusion and laceration of right cerebrum with loss of consciousness of 1 hour to 5 hours 59 minutes, subsequent encounter                                                             |
| S06313S | Contusion and laceration of right cerebrum with loss of consciousness of 1 hour to 5 hours 59 minutes, sequela                                                                          |
| S06314A | Contusion and laceration of right cerebrum with loss of consciousness of 6 hours to 24 hours, initial encounter                                                                         |
| S06314D | Contusion and laceration of right cerebrum with loss of consciousness of 6 hours to 24 hours, subsequent encounter                                                                      |
| S06314S | Contusion and laceration of right cerebrum with loss of consciousness of 6 hours to 24 hours, sequela                                                                                   |
| S06315A | Contusion and laceration of right cerebrum with loss of consciousness greater than 24 hours with return to pre-existing conscious level, initial encounter                              |
| S06315D | Contusion and laceration of right cerebrum with loss of consciousness greater than 24 hours with return to pre-existing conscious level, subsequent encounter                           |
| S06315S | Contusion and laceration of right cerebrum with loss of consciousness greater than 24 hours with return to pre-existing conscious level, sequela                                        |
| S06316A | Contusion and laceration of right cerebrum with loss of consciousness greater than 24 hours without return to pre-existing conscious level with patient surviving, initial encounter    |
| S06316D | Contusion and laceration of right cerebrum with loss of consciousness greater than 24 hours without return to pre-existing conscious level with patient surviving, subsequent encounter |
| S06316S | Contusion and laceration of right cerebrum with loss of consciousness greater than 24 hours without return to pre-existing conscious level with patient surviving, sequela              |
| S06317A | Contusion and laceration of right cerebrum with loss of consciousness of any duration with death due to brain injury prior to regaining consciousness, initial encounter                |
| S06318A | Contusion and laceration of right cerebrum with loss of consciousness of any duration with death due to other cause prior to regaining consciousness, initial encounter                 |

|         |                                                                                                                                                                                        |
|---------|----------------------------------------------------------------------------------------------------------------------------------------------------------------------------------------|
| S06319A | Contusion and laceration of right cerebrum with loss of consciousness of unspecified duration, initial encounter                                                                       |
| S06319D | Contusion and laceration of right cerebrum with loss of consciousness of unspecified duration, subsequent encounter                                                                    |
| S06319S | Contusion and laceration of right cerebrum with loss of consciousness of unspecified duration, sequela                                                                                 |
| S06320A | Contusion and laceration of left cerebrum without loss of consciousness, initial encounter                                                                                             |
| S06320D | Contusion and laceration of left cerebrum without loss of consciousness, subsequent encounter                                                                                          |
| S06320S | Contusion and laceration of left cerebrum without loss of consciousness, sequela                                                                                                       |
| S06321A | Contusion and laceration of left cerebrum with loss of consciousness of 30 minutes or less, initial encounter                                                                          |
| S06321D | Contusion and laceration of left cerebrum with loss of consciousness of 30 minutes or less, subsequent encounter                                                                       |
| S06321S | Contusion and laceration of left cerebrum with loss of consciousness of 30 minutes or less, sequela                                                                                    |
| S06322A | Contusion and laceration of left cerebrum with loss of consciousness of 31 minutes to 59 minutes, initial encounter                                                                    |
| S06322D | Contusion and laceration of left cerebrum with loss of consciousness of 31 minutes to 59 minutes, subsequent encounter                                                                 |
| S06322S | Contusion and laceration of left cerebrum with loss of consciousness of 31 minutes to 59 minutes, sequela                                                                              |
| S06323A | Contusion and laceration of left cerebrum with loss of consciousness of 1 hour to 5 hours 59 minutes, initial encounter                                                                |
| S06323D | Contusion and laceration of left cerebrum with loss of consciousness of 1 hour to 5 hours 59 minutes, subsequent encounter                                                             |
| S06323S | Contusion and laceration of left cerebrum with loss of consciousness of 1 hour to 5 hours 59 minutes, sequela                                                                          |
| S06324A | Contusion and laceration of left cerebrum with loss of consciousness of 6 hours to 24 hours, initial encounter                                                                         |
| S06324D | Contusion and laceration of left cerebrum with loss of consciousness of 6 hours to 24 hours, subsequent encounter                                                                      |
| S06324S | Contusion and laceration of left cerebrum with loss of consciousness of 6 hours to 24 hours, sequela                                                                                   |
| S06325A | Contusion and laceration of left cerebrum with loss of consciousness greater than 24 hours with return to pre-existing conscious level, initial encounter                              |
| S06325D | Contusion and laceration of left cerebrum with loss of consciousness greater than 24 hours with return to pre-existing conscious level, subsequent encounter                           |
| S06325S | Contusion and laceration of left cerebrum with loss of consciousness greater than 24 hours with return to pre-existing conscious level, sequela                                        |
| S06326A | Contusion and laceration of left cerebrum with loss of consciousness greater than 24 hours without return to pre-existing conscious level with patient surviving, initial encounter    |
| S06326D | Contusion and laceration of left cerebrum with loss of consciousness greater than 24 hours without return to pre-existing conscious level with patient surviving, subsequent encounter |

|         |                                                                                                                                                                           |
|---------|---------------------------------------------------------------------------------------------------------------------------------------------------------------------------|
| S06326S | Contusion and laceration of left cerebrum with loss of consciousness greater than 24 hours without return to pre-existing conscious level with patient surviving, sequela |
| S06327A | Contusion and laceration of left cerebrum with loss of consciousness of any duration with death due to brain injury prior to regaining consciousness, initial encounter   |
| S06328A | Contusion and laceration of left cerebrum with loss of consciousness of any duration with death due to other cause prior to regaining consciousness, initial encounter    |
| S06329A | Contusion and laceration of left cerebrum with loss of consciousness of unspecified duration, initial encounter                                                           |
| S06329D | Contusion and laceration of left cerebrum with loss of consciousness of unspecified duration, subsequent encounter                                                        |
| S06329S | Contusion and laceration of left cerebrum with loss of consciousness of unspecified duration, sequela                                                                     |
| S06330A | Contusion and laceration of cerebrum, unspecified, without loss of consciousness, initial encounter                                                                       |
| S06330D | Contusion and laceration of cerebrum, unspecified, without loss of consciousness, subsequent encounter                                                                    |
| S06330S | Contusion and laceration of cerebrum, unspecified, without loss of consciousness, sequela                                                                                 |
| S06331A | Contusion and laceration of cerebrum, unspecified, with loss of consciousness of 30 minutes or less, initial encounter                                                    |
| S06331D | Contusion and laceration of cerebrum, unspecified, with loss of consciousness of 30 minutes or less, subsequent encounter                                                 |
| S06331S | Contusion and laceration of cerebrum, unspecified, with loss of consciousness of 30 minutes or less, sequela                                                              |
| S06332A | Contusion and laceration of cerebrum, unspecified, with loss of consciousness of 31 minutes to 59 minutes, initial encounter                                              |
| S06332D | Contusion and laceration of cerebrum, unspecified, with loss of consciousness of 31 minutes to 59 minutes, subsequent encounter                                           |
| S06332S | Contusion and laceration of cerebrum, unspecified, with loss of consciousness of 31 minutes to 59 minutes, sequela                                                        |
| S06333A | Contusion and laceration of cerebrum, unspecified, with loss of consciousness of 1 hour to 5 hours 59 minutes, initial encounter                                          |
| S06333D | Contusion and laceration of cerebrum, unspecified, with loss of consciousness of 1 hour to 5 hours 59 minutes, subsequent encounter                                       |
| S06333S | Contusion and laceration of cerebrum, unspecified, with loss of consciousness of 1 hour to 5 hours 59 minutes, sequela                                                    |
| S06334A | Contusion and laceration of cerebrum, unspecified, with loss of consciousness of 6 hours to 24 hours, initial encounter                                                   |
| S06334D | Contusion and laceration of cerebrum, unspecified, with loss of consciousness of 6 hours to 24 hours, subsequent encounter                                                |
| S06334S | Contusion and laceration of cerebrum, unspecified, with loss of consciousness of 6 hours to 24 hours, sequela                                                             |
| S06335A | Contusion and laceration of cerebrum, unspecified, with loss of consciousness greater than 24 hours with return to pre-existing conscious level, initial encounter        |
| S06335D | Contusion and laceration of cerebrum, unspecified, with loss of consciousness greater than 24 hours with return to pre-existing conscious level, subsequent encounter     |

|         |                                                                                                                                                                                                 |
|---------|-------------------------------------------------------------------------------------------------------------------------------------------------------------------------------------------------|
| S06335S | Contusion and laceration of cerebrum, unspecified, with loss of consciousness greater than 24 hours with return to pre-existing conscious level, sequela                                        |
| S06336A | Contusion and laceration of cerebrum, unspecified, with loss of consciousness greater than 24 hours without return to pre-existing conscious level with patient surviving, initial encounter    |
| S06336D | Contusion and laceration of cerebrum, unspecified, with loss of consciousness greater than 24 hours without return to pre-existing conscious level with patient surviving, subsequent encounter |
| S06336S | Contusion and laceration of cerebrum, unspecified, with loss of consciousness greater than 24 hours without return to pre-existing conscious level with patient surviving, sequela              |
| S06337A | Contusion and laceration of cerebrum, unspecified, with loss of consciousness of any duration with death due to brain injury prior to regaining consciousness, initial encounter                |
| S06338A | Contusion and laceration of cerebrum, unspecified, with loss of consciousness of any duration with death due to other cause prior to regaining consciousness, initial encounter                 |
| S06339A | Contusion and laceration of cerebrum, unspecified, with loss of consciousness of unspecified duration, initial encounter                                                                        |
| S06339D | Contusion and laceration of cerebrum, unspecified, with loss of consciousness of unspecified duration, subsequent encounter                                                                     |
| S06339S | Contusion and laceration of cerebrum, unspecified, with loss of consciousness of unspecified duration, sequela                                                                                  |
| S06340A | Traumatic hemorrhage of right cerebrum without loss of consciousness, initial encounter                                                                                                         |
| S06340D | Traumatic hemorrhage of right cerebrum without loss of consciousness, subsequent encounter                                                                                                      |
| S06340S | Traumatic hemorrhage of right cerebrum without loss of consciousness, sequela                                                                                                                   |
| S06341A | Traumatic hemorrhage of right cerebrum with loss of consciousness of 30 minutes or less, initial encounter                                                                                      |
| S06341D | Traumatic hemorrhage of right cerebrum with loss of consciousness of 30 minutes or less, subsequent encounter                                                                                   |
| S06341S | Traumatic hemorrhage of right cerebrum with loss of consciousness of 30 minutes or less, sequela                                                                                                |
| S06342A | Traumatic hemorrhage of right cerebrum with loss of consciousness of 31 minutes to 59 minutes, initial encounter                                                                                |
| S06342D | Traumatic hemorrhage of right cerebrum with loss of consciousness of 31 minutes to 59 minutes, subsequent encounter                                                                             |
| S06342S | Traumatic hemorrhage of right cerebrum with loss of consciousness of 31 minutes to 59 minutes, sequela                                                                                          |
| S06343A | Traumatic hemorrhage of right cerebrum with loss of consciousness of 1 hours to 5 hours 59 minutes, initial encounter                                                                           |
| S06343D | Traumatic hemorrhage of right cerebrum with loss of consciousness of 1 hours to 5 hours 59 minutes, subsequent encounter                                                                        |
| S06343S | Traumatic hemorrhage of right cerebrum with loss of consciousness of 1 hours to 5 hours 59 minutes, sequela                                                                                     |
| S06344A | Traumatic hemorrhage of right cerebrum with loss of consciousness of 6 hours to 24 hours, initial encounter                                                                                     |

|         |                                                                                                                                                                                     |
|---------|-------------------------------------------------------------------------------------------------------------------------------------------------------------------------------------|
| S06344D | Traumatic hemorrhage of right cerebrum with loss of consciousness of 6 hours to 24 hours, subsequent encounter                                                                      |
| S06344S | Traumatic hemorrhage of right cerebrum with loss of consciousness of 6 hours to 24 hours, sequela                                                                                   |
| S06345A | Traumatic hemorrhage of right cerebrum with loss of consciousness greater than 24 hours with return to pre-existing conscious level, initial encounter                              |
| S06345D | Traumatic hemorrhage of right cerebrum with loss of consciousness greater than 24 hours with return to pre-existing conscious level, subsequent encounter                           |
| S06345S | Traumatic hemorrhage of right cerebrum with loss of consciousness greater than 24 hours with return to pre-existing conscious level, sequela                                        |
| S06346A | Traumatic hemorrhage of right cerebrum with loss of consciousness greater than 24 hours without return to pre-existing conscious level with patient surviving, initial encounter    |
| S06346D | Traumatic hemorrhage of right cerebrum with loss of consciousness greater than 24 hours without return to pre-existing conscious level with patient surviving, subsequent encounter |
| S06346S | Traumatic hemorrhage of right cerebrum with loss of consciousness greater than 24 hours without return to pre-existing conscious level with patient surviving, sequela              |
| S06347A | Traumatic hemorrhage of right cerebrum with loss of consciousness of any duration with death due to brain injury prior to regaining consciousness, initial encounter                |
| S06348A | Traumatic hemorrhage of right cerebrum with loss of consciousness of any duration with death due to other cause prior to regaining consciousness, initial encounter                 |
| S06349A | Traumatic hemorrhage of right cerebrum with loss of consciousness of unspecified duration, initial encounter                                                                        |
| S06349D | Traumatic hemorrhage of right cerebrum with loss of consciousness of unspecified duration, subsequent encounter                                                                     |
| S06349S | Traumatic hemorrhage of right cerebrum with loss of consciousness of unspecified duration, sequela                                                                                  |
| S06350A | Traumatic hemorrhage of left cerebrum without loss of consciousness, initial encounter                                                                                              |
| S06350D | Traumatic hemorrhage of left cerebrum without loss of consciousness, subsequent encounter                                                                                           |
| S06350S | Traumatic hemorrhage of left cerebrum without loss of consciousness, sequela                                                                                                        |
| S06351A | Traumatic hemorrhage of left cerebrum with loss of consciousness of 30 minutes or less, initial encounter                                                                           |
| S06351D | Traumatic hemorrhage of left cerebrum with loss of consciousness of 30 minutes or less, subsequent encounter                                                                        |
| S06351S | Traumatic hemorrhage of left cerebrum with loss of consciousness of 30 minutes or less, sequela                                                                                     |
| S06352A | Traumatic hemorrhage of left cerebrum with loss of consciousness of 31 minutes to 59 minutes, initial encounter                                                                     |
| S06352D | Traumatic hemorrhage of left cerebrum with loss of consciousness of 31 minutes to 59 minutes, subsequent encounter                                                                  |
| S06352S | Traumatic hemorrhage of left cerebrum with loss of consciousness of 31 minutes to 59 minutes, sequela                                                                               |
| S06353A | Traumatic hemorrhage of left cerebrum with loss of consciousness of 1 hours to 5 hours 59 minutes, initial encounter                                                                |

|         |                                                                                                                                                                                    |
|---------|------------------------------------------------------------------------------------------------------------------------------------------------------------------------------------|
| S06353D | Traumatic hemorrhage of left cerebrum with loss of consciousness of 1 hours to 5 hours 59 minutes, subsequent encounter                                                            |
| S06353S | Traumatic hemorrhage of left cerebrum with loss of consciousness of 1 hours to 5 hours 59 minutes, sequela                                                                         |
| S06354A | Traumatic hemorrhage of left cerebrum with loss of consciousness of 6 hours to 24 hours, initial encounter                                                                         |
| S06354D | Traumatic hemorrhage of left cerebrum with loss of consciousness of 6 hours to 24 hours, subsequent encounter                                                                      |
| S06354S | Traumatic hemorrhage of left cerebrum with loss of consciousness of 6 hours to 24 hours, sequela                                                                                   |
| S06355A | Traumatic hemorrhage of left cerebrum with loss of consciousness greater than 24 hours with return to pre-existing conscious level, initial encounter                              |
| S06355D | Traumatic hemorrhage of left cerebrum with loss of consciousness greater than 24 hours with return to pre-existing conscious level, subsequent encounter                           |
| S06355S | Traumatic hemorrhage of left cerebrum with loss of consciousness greater than 24 hours with return to pre-existing conscious level, sequela                                        |
| S06356A | Traumatic hemorrhage of left cerebrum with loss of consciousness greater than 24 hours without return to pre-existing conscious level with patient surviving, initial encounter    |
| S06356D | Traumatic hemorrhage of left cerebrum with loss of consciousness greater than 24 hours without return to pre-existing conscious level with patient surviving, subsequent encounter |
| S06356S | Traumatic hemorrhage of left cerebrum with loss of consciousness greater than 24 hours without return to pre-existing conscious level with patient surviving, sequela              |
| S06357A | Traumatic hemorrhage of left cerebrum with loss of consciousness of any duration with death due to brain injury prior to regaining consciousness, initial encounter                |
| S06358A | Traumatic hemorrhage of left cerebrum with loss of consciousness of any duration with death due to other cause prior to regaining consciousness, initial encounter                 |
| S06359A | Traumatic hemorrhage of left cerebrum with loss of consciousness of unspecified duration, initial encounter                                                                        |
| S06359D | Traumatic hemorrhage of left cerebrum with loss of consciousness of unspecified duration, subsequent encounter                                                                     |
| S06359S | Traumatic hemorrhage of left cerebrum with loss of consciousness of unspecified duration, sequela                                                                                  |
| S06360A | Traumatic hemorrhage of cerebrum, unspecified, without loss of consciousness, initial encounter                                                                                    |
| S06360D | Traumatic hemorrhage of cerebrum, unspecified, without loss of consciousness, subsequent encounter                                                                                 |
| S06360S | Traumatic hemorrhage of cerebrum, unspecified, without loss of consciousness, sequela                                                                                              |
| S06361A | Traumatic hemorrhage of cerebrum, unspecified, with loss of consciousness of 30 minutes or less, initial encounter                                                                 |
| S06361D | Traumatic hemorrhage of cerebrum, unspecified, with loss of consciousness of 30 minutes or less, subsequent encounter                                                              |
| S06361S | Traumatic hemorrhage of cerebrum, unspecified, with loss of consciousness of 30 minutes or less, sequela                                                                           |
| S06362A | Traumatic hemorrhage of cerebrum, unspecified, with loss of consciousness of 31 minutes to 59 minutes, initial encounter                                                           |

|         |                                                                                                                                                                                             |
|---------|---------------------------------------------------------------------------------------------------------------------------------------------------------------------------------------------|
| S06362D | Traumatic hemorrhage of cerebrum, unspecified, with loss of consciousness of 31 minutes to 59 minutes, subsequent encounter                                                                 |
| S06362S | Traumatic hemorrhage of cerebrum, unspecified, with loss of consciousness of 31 minutes to 59 minutes, sequela                                                                              |
| S06363A | Traumatic hemorrhage of cerebrum, unspecified, with loss of consciousness of 1 hours to 5 hours 59 minutes, initial encounter                                                               |
| S06363D | Traumatic hemorrhage of cerebrum, unspecified, with loss of consciousness of 1 hours to 5 hours 59 minutes, subsequent encounter                                                            |
| S06363S | Traumatic hemorrhage of cerebrum, unspecified, with loss of consciousness of 1 hours to 5 hours 59 minutes, sequela                                                                         |
| S06364A | Traumatic hemorrhage of cerebrum, unspecified, with loss of consciousness of 6 hours to 24 hours, initial encounter                                                                         |
| S06364D | Traumatic hemorrhage of cerebrum, unspecified, with loss of consciousness of 6 hours to 24 hours, subsequent encounter                                                                      |
| S06364S | Traumatic hemorrhage of cerebrum, unspecified, with loss of consciousness of 6 hours to 24 hours, sequela                                                                                   |
| S06365A | Traumatic hemorrhage of cerebrum, unspecified, with loss of consciousness greater than 24 hours with return to pre-existing conscious level, initial encounter                              |
| S06365D | Traumatic hemorrhage of cerebrum, unspecified, with loss of consciousness greater than 24 hours with return to pre-existing conscious level, subsequent encounter                           |
| S06365S | Traumatic hemorrhage of cerebrum, unspecified, with loss of consciousness greater than 24 hours with return to pre-existing conscious level, sequela                                        |
| S06366A | Traumatic hemorrhage of cerebrum, unspecified, with loss of consciousness greater than 24 hours without return to pre-existing conscious level with patient surviving, initial encounter    |
| S06366D | Traumatic hemorrhage of cerebrum, unspecified, with loss of consciousness greater than 24 hours without return to pre-existing conscious level with patient surviving, subsequent encounter |
| S06366S | Traumatic hemorrhage of cerebrum, unspecified, with loss of consciousness greater than 24 hours without return to pre-existing conscious level with patient surviving, sequela              |
| S06367A | Traumatic hemorrhage of cerebrum, unspecified, with loss of consciousness of any duration with death due to brain injury prior to regaining consciousness, initial encounter                |
| S06368A | Traumatic hemorrhage of cerebrum, unspecified, with loss of consciousness of any duration with death due to other cause prior to regaining consciousness, initial encounter                 |
| S06369A | Traumatic hemorrhage of cerebrum, unspecified, with loss of consciousness of unspecified duration, initial encounter                                                                        |
| S06369D | Traumatic hemorrhage of cerebrum, unspecified, with loss of consciousness of unspecified duration, subsequent encounter                                                                     |
| S06369S | Traumatic hemorrhage of cerebrum, unspecified, with loss of consciousness of unspecified duration, sequela                                                                                  |
| S06370A | Contusion, laceration, and hemorrhage of cerebellum without loss of consciousness, initial encounter                                                                                        |
| S06370D | Contusion, laceration, and hemorrhage of cerebellum without loss of consciousness, subsequent encounter                                                                                     |
| S06370S | Contusion, laceration, and hemorrhage of cerebellum without loss of consciousness, sequela                                                                                                  |

|         |                                                                                                                                                                                                  |
|---------|--------------------------------------------------------------------------------------------------------------------------------------------------------------------------------------------------|
| S06371A | Contusion, laceration, and hemorrhage of cerebellum with loss of consciousness of 30 minutes or less, initial encounter                                                                          |
| S06371D | Contusion, laceration, and hemorrhage of cerebellum with loss of consciousness of 30 minutes or less, subsequent encounter                                                                       |
| S06371S | Contusion, laceration, and hemorrhage of cerebellum with loss of consciousness of 30 minutes or less, sequela                                                                                    |
| S06372A | Contusion, laceration, and hemorrhage of cerebellum with loss of consciousness of 31 minutes to 59 minutes, initial encounter                                                                    |
| S06372D | Contusion, laceration, and hemorrhage of cerebellum with loss of consciousness of 31 minutes to 59 minutes, subsequent encounter                                                                 |
| S06372S | Contusion, laceration, and hemorrhage of cerebellum with loss of consciousness of 31 minutes to 59 minutes, sequela                                                                              |
| S06373A | Contusion, laceration, and hemorrhage of cerebellum with loss of consciousness of 1 hour to 5 hours 59 minutes, initial encounter                                                                |
| S06373D | Contusion, laceration, and hemorrhage of cerebellum with loss of consciousness of 1 hour to 5 hours 59 minutes, subsequent encounter                                                             |
| S06373S | Contusion, laceration, and hemorrhage of cerebellum with loss of consciousness of 1 hour to 5 hours 59 minutes, sequela                                                                          |
| S06374A | Contusion, laceration, and hemorrhage of cerebellum with loss of consciousness of 6 hours to 24 hours, initial encounter                                                                         |
| S06374D | Contusion, laceration, and hemorrhage of cerebellum with loss of consciousness of 6 hours to 24 hours, subsequent encounter                                                                      |
| S06374S | Contusion, laceration, and hemorrhage of cerebellum with loss of consciousness of 6 hours to 24 hours, sequela                                                                                   |
| S06375A | Contusion, laceration, and hemorrhage of cerebellum with loss of consciousness greater than 24 hours with return to pre-existing conscious level, initial encounter                              |
| S06375D | Contusion, laceration, and hemorrhage of cerebellum with loss of consciousness greater than 24 hours with return to pre-existing conscious level, subsequent encounter                           |
| S06375S | Contusion, laceration, and hemorrhage of cerebellum with loss of consciousness greater than 24 hours with return to pre-existing conscious level, sequela                                        |
| S06376A | Contusion, laceration, and hemorrhage of cerebellum with loss of consciousness greater than 24 hours without return to pre-existing conscious level with patient surviving, initial encounter    |
| S06376D | Contusion, laceration, and hemorrhage of cerebellum with loss of consciousness greater than 24 hours without return to pre-existing conscious level with patient surviving, subsequent encounter |
| S06376S | Contusion, laceration, and hemorrhage of cerebellum with loss of consciousness greater than 24 hours without return to pre-existing conscious level with patient surviving, sequela              |
| S06377A | Contusion, laceration, and hemorrhage of cerebellum with loss of consciousness of any duration with death due to brain injury prior to regaining consciousness, initial encounter                |
| S06378A | Contusion, laceration, and hemorrhage of cerebellum with loss of consciousness of any duration with death due to other cause prior to regaining consciousness, initial encounter                 |
| S06379A | Contusion, laceration, and hemorrhage of cerebellum with loss of consciousness of unspecified duration, initial encounter                                                                        |
| S06379D | Contusion, laceration, and hemorrhage of cerebellum with loss of consciousness of unspecified duration, subsequent encounter                                                                     |



|         |                                                                                                                                                                                                 |
|---------|-------------------------------------------------------------------------------------------------------------------------------------------------------------------------------------------------|
| S06379S | Contusion, laceration, and hemorrhage of cerebellum with loss of consciousness of unspecified duration, sequela                                                                                 |
| S06380A | Contusion, laceration, and hemorrhage of brainstem without loss of consciousness, initial encounter                                                                                             |
| S06380D | Contusion, laceration, and hemorrhage of brainstem without loss of consciousness, subsequent encounter                                                                                          |
| S06380S | Contusion, laceration, and hemorrhage of brainstem without loss of consciousness, sequela                                                                                                       |
| S06381A | Contusion, laceration, and hemorrhage of brainstem with loss of consciousness of 30 minutes or less, initial encounter                                                                          |
| S06381D | Contusion, laceration, and hemorrhage of brainstem with loss of consciousness of 30 minutes or less, subsequent encounter                                                                       |
| S06381S | Contusion, laceration, and hemorrhage of brainstem with loss of consciousness of 30 minutes or less, sequela                                                                                    |
| S06382A | Contusion, laceration, and hemorrhage of brainstem with loss of consciousness of 31 minutes to 59 minutes, initial encounter                                                                    |
| S06382D | Contusion, laceration, and hemorrhage of brainstem with loss of consciousness of 31 minutes to 59 minutes, subsequent encounter                                                                 |
| S06382S | Contusion, laceration, and hemorrhage of brainstem with loss of consciousness of 31 minutes to 59 minutes, sequela                                                                              |
| S06383A | Contusion, laceration, and hemorrhage of brainstem with loss of consciousness of 1 hour to 5 hours 59 minutes, initial encounter                                                                |
| S06383D | Contusion, laceration, and hemorrhage of brainstem with loss of consciousness of 1 hour to 5 hours 59 minutes, subsequent encounter                                                             |
| S06383S | Contusion, laceration, and hemorrhage of brainstem with loss of consciousness of 1 hour to 5 hours 59 minutes, sequela                                                                          |
| S06384A | Contusion, laceration, and hemorrhage of brainstem with loss of consciousness of 6 hours to 24 hours, initial encounter                                                                         |
| S06384D | Contusion, laceration, and hemorrhage of brainstem with loss of consciousness of 6 hours to 24 hours, subsequent encounter                                                                      |
| S06384S | Contusion, laceration, and hemorrhage of brainstem with loss of consciousness of 6 hours to 24 hours, sequela                                                                                   |
| S06385A | Contusion, laceration, and hemorrhage of brainstem with loss of consciousness greater than 24 hours with return to pre-existing conscious level, initial encounter                              |
| S06385D | Contusion, laceration, and hemorrhage of brainstem with loss of consciousness greater than 24 hours with return to pre-existing conscious level, subsequent encounter                           |
| S06385S | Contusion, laceration, and hemorrhage of brainstem with loss of consciousness greater than 24 hours with return to pre-existing conscious level, sequela                                        |
| S06386A | Contusion, laceration, and hemorrhage of brainstem with loss of consciousness greater than 24 hours without return to pre-existing conscious level with patient surviving, initial encounter    |
| S06386D | Contusion, laceration, and hemorrhage of brainstem with loss of consciousness greater than 24 hours without return to pre-existing conscious level with patient surviving, subsequent encounter |
| S06386S | Contusion, laceration, and hemorrhage of brainstem with loss of consciousness greater than 24 hours without return to pre-existing conscious level with patient surviving, sequela              |

|         |                                                                                                                                                                                  |
|---------|----------------------------------------------------------------------------------------------------------------------------------------------------------------------------------|
| S06387A | Contusion, laceration, and hemorrhage of brainstem with loss of consciousness of any duration with death due to brain injury prior to regaining consciousness, initial encounter |
| S06388A | Contusion, laceration, and hemorrhage of brainstem with loss of consciousness of any duration with death due to other cause prior to regaining consciousness, initial encounter  |
| S06389A | Contusion, laceration, and hemorrhage of brainstem with loss of consciousness of unspecified duration, initial encounter                                                         |
| S06389D | Contusion, laceration, and hemorrhage of brainstem with loss of consciousness of unspecified duration, subsequent encounter                                                      |
| S06389S | Contusion, laceration, and hemorrhage of brainstem with loss of consciousness of unspecified duration, sequela                                                                   |
| S064X0A | Epidural hemorrhage without loss of consciousness, initial encounter                                                                                                             |
| S064X0D | Epidural hemorrhage without loss of consciousness, subsequent encounter                                                                                                          |
| S064X0S | Epidural hemorrhage without loss of consciousness, sequela                                                                                                                       |
| S064X1A | Epidural hemorrhage with loss of consciousness of 30 minutes or less, initial encounter                                                                                          |
| S064X1D | Epidural hemorrhage with loss of consciousness of 30 minutes or less, subsequent encounter                                                                                       |
| S064X1S | Epidural hemorrhage with loss of consciousness of 30 minutes or less, sequela                                                                                                    |
| S064X2A | Epidural hemorrhage with loss of consciousness of 31 minutes to 59 minutes, initial encounter                                                                                    |
| S064X2D | Epidural hemorrhage with loss of consciousness of 31 minutes to 59 minutes, subsequent encounter                                                                                 |
| S064X2S | Epidural hemorrhage with loss of consciousness of 31 minutes to 59 minutes, sequela                                                                                              |
| S064X3A | Epidural hemorrhage with loss of consciousness of 1 hour to 5 hours 59 minutes, initial encounter                                                                                |
| S064X3D | Epidural hemorrhage with loss of consciousness of 1 hour to 5 hours 59 minutes, subsequent encounter                                                                             |
| S064X3S | Epidural hemorrhage with loss of consciousness of 1 hour to 5 hours 59 minutes, sequela                                                                                          |
| S064X4A | Epidural hemorrhage with loss of consciousness of 6 hours to 24 hours, initial encounter                                                                                         |
| S064X4D | Epidural hemorrhage with loss of consciousness of 6 hours to 24 hours, subsequent encounter                                                                                      |
| S064X4S | Epidural hemorrhage with loss of consciousness of 6 hours to 24 hours, sequela                                                                                                   |
| S064X5A | Epidural hemorrhage with loss of consciousness greater than 24 hours with return to pre-existing conscious level, initial encounter                                              |
| S064X5D | Epidural hemorrhage with loss of consciousness greater than 24 hours with return to pre-existing conscious level, subsequent encounter                                           |
| S064X5S | Epidural hemorrhage with loss of consciousness greater than 24 hours with return to pre-existing conscious level, sequela                                                        |
| S064X6A | Epidural hemorrhage with loss of consciousness greater than 24 hours without return to pre-existing conscious level with patient surviving, initial encounter                    |
| S064X6D | Epidural hemorrhage with loss of consciousness greater than 24 hours without return to pre-existing conscious level with patient surviving, subsequent encounter                 |
| S064X6S | Epidural hemorrhage with loss of consciousness greater than 24 hours without return to pre-existing conscious level with patient surviving, sequela                              |

|         |                                                                                                                                                                            |
|---------|----------------------------------------------------------------------------------------------------------------------------------------------------------------------------|
| S064X7A | Epidural hemorrhage with loss of consciousness of any duration with death due to brain injury prior to regaining consciousness, initial encounter                          |
| S064X8A | Epidural hemorrhage with loss of consciousness of any duration with death due to other causes prior to regaining consciousness, initial encounter                          |
| S064X9A | Epidural hemorrhage with loss of consciousness of unspecified duration, initial encounter                                                                                  |
| S064X9D | Epidural hemorrhage with loss of consciousness of unspecified duration, subsequent encounter                                                                               |
| S064X9S | Epidural hemorrhage with loss of consciousness of unspecified duration, sequela                                                                                            |
| S065X0A | Traumatic subdural hemorrhage without loss of consciousness, initial encounter                                                                                             |
| S065X0D | Traumatic subdural hemorrhage without loss of consciousness, subsequent encounter                                                                                          |
| S065X0S | Traumatic subdural hemorrhage without loss of consciousness, sequela                                                                                                       |
| S065X1A | Traumatic subdural hemorrhage with loss of consciousness of 30 minutes or less, initial encounter                                                                          |
| S065X1D | Traumatic subdural hemorrhage with loss of consciousness of 30 minutes or less, subsequent encounter                                                                       |
| S065X1S | Traumatic subdural hemorrhage with loss of consciousness of 30 minutes or less, sequela                                                                                    |
| S065X2A | Traumatic subdural hemorrhage with loss of consciousness of 31 minutes to 59 minutes, initial encounter                                                                    |
| S065X2D | Traumatic subdural hemorrhage with loss of consciousness of 31 minutes to 59 minutes, subsequent encounter                                                                 |
| S065X2S | Traumatic subdural hemorrhage with loss of consciousness of 31 minutes to 59 minutes, sequela                                                                              |
| S065X3A | Traumatic subdural hemorrhage with loss of consciousness of 1 hour to 5 hours 59 minutes, initial encounter                                                                |
| S065X3D | Traumatic subdural hemorrhage with loss of consciousness of 1 hour to 5 hours 59 minutes, subsequent encounter                                                             |
| S065X3S | Traumatic subdural hemorrhage with loss of consciousness of 1 hour to 5 hours 59 minutes, sequela                                                                          |
| S065X4A | Traumatic subdural hemorrhage with loss of consciousness of 6 hours to 24 hours, initial encounter                                                                         |
| S065X4D | Traumatic subdural hemorrhage with loss of consciousness of 6 hours to 24 hours, subsequent encounter                                                                      |
| S065X4S | Traumatic subdural hemorrhage with loss of consciousness of 6 hours to 24 hours, sequela                                                                                   |
| S065X5A | Traumatic subdural hemorrhage with loss of consciousness greater than 24 hours with return to pre-existing conscious level, initial encounter                              |
| S065X5D | Traumatic subdural hemorrhage with loss of consciousness greater than 24 hours with return to pre-existing conscious level, subsequent encounter                           |
| S065X5S | Traumatic subdural hemorrhage with loss of consciousness greater than 24 hours with return to pre-existing conscious level, sequela                                        |
| S065X6A | Traumatic subdural hemorrhage with loss of consciousness greater than 24 hours without return to pre-existing conscious level with patient surviving, initial encounter    |
| S065X6D | Traumatic subdural hemorrhage with loss of consciousness greater than 24 hours without return to pre-existing conscious level with patient surviving, subsequent encounter |
| S065X6S | Traumatic subdural hemorrhage with loss of consciousness greater than 24 hours without return to pre-existing conscious level with patient surviving, sequela              |

|         |                                                                                                                                                                             |
|---------|-----------------------------------------------------------------------------------------------------------------------------------------------------------------------------|
| S065X7A | Traumatic subdural hemorrhage with loss of consciousness of any duration with death due to brain injury before regaining consciousness, initial encounter                   |
| S065X8A | Traumatic subdural hemorrhage with loss of consciousness of any duration with death due to other cause before regaining consciousness, initial encounter                    |
| S065X9A | Traumatic subdural hemorrhage with loss of consciousness of unspecified duration, initial encounter                                                                         |
| S065X9D | Traumatic subdural hemorrhage with loss of consciousness of unspecified duration, subsequent encounter                                                                      |
| S065X9S | Traumatic subdural hemorrhage with loss of consciousness of unspecified duration, sequela                                                                                   |
| S066X0A | Traumatic subarachnoid hemorrhage without loss of consciousness, initial encounter                                                                                          |
| S066X0D | Traumatic subarachnoid hemorrhage without loss of consciousness, subsequent encounter                                                                                       |
| S066X0S | Traumatic subarachnoid hemorrhage without loss of consciousness, sequela                                                                                                    |
| S066X1A | Traumatic subarachnoid hemorrhage with loss of consciousness of 30 minutes or less, initial encounter                                                                       |
| S066X1D | Traumatic subarachnoid hemorrhage with loss of consciousness of 30 minutes or less, subsequent encounter                                                                    |
| S066X1S | Traumatic subarachnoid hemorrhage with loss of consciousness of 30 minutes or less, sequela                                                                                 |
| S066X2A | Traumatic subarachnoid hemorrhage with loss of consciousness of 31 minutes to 59 minutes, initial encounter                                                                 |
| S066X2D | Traumatic subarachnoid hemorrhage with loss of consciousness of 31 minutes to 59 minutes, subsequent encounter                                                              |
| S066X2S | Traumatic subarachnoid hemorrhage with loss of consciousness of 31 minutes to 59 minutes, sequela                                                                           |
| S066X3A | Traumatic subarachnoid hemorrhage with loss of consciousness of 1 hour to 5 hours 59 minutes, initial encounter                                                             |
| S066X3D | Traumatic subarachnoid hemorrhage with loss of consciousness of 1 hour to 5 hours 59 minutes, subsequent encounter                                                          |
| S066X3S | Traumatic subarachnoid hemorrhage with loss of consciousness of 1 hour to 5 hours 59 minutes, sequela                                                                       |
| S066X4A | Traumatic subarachnoid hemorrhage with loss of consciousness of 6 hours to 24 hours, initial encounter                                                                      |
| S066X4D | Traumatic subarachnoid hemorrhage with loss of consciousness of 6 hours to 24 hours, subsequent encounter                                                                   |
| S066X4S | Traumatic subarachnoid hemorrhage with loss of consciousness of 6 hours to 24 hours, sequela                                                                                |
| S066X5A | Traumatic subarachnoid hemorrhage with loss of consciousness greater than 24 hours with return to pre-existing conscious level, initial encounter                           |
| S066X5D | Traumatic subarachnoid hemorrhage with loss of consciousness greater than 24 hours with return to pre-existing conscious level, subsequent encounter                        |
| S066X5S | Traumatic subarachnoid hemorrhage with loss of consciousness greater than 24 hours with return to pre-existing conscious level, sequela                                     |
| S066X6A | Traumatic subarachnoid hemorrhage with loss of consciousness greater than 24 hours without return to pre-existing conscious level with patient surviving, initial encounter |

|         |                                                                                                                                                                                |
|---------|--------------------------------------------------------------------------------------------------------------------------------------------------------------------------------|
| S066X6D | Traumatic subarachnoid hemorrhage with loss of consciousness greater than 24 hours without return to pre-existing conscious level with patient surviving, subsequent encounter |
| S066X6S | Traumatic subarachnoid hemorrhage with loss of consciousness greater than 24 hours without return to pre-existing conscious level with patient surviving, sequela              |
| S066X7A | Traumatic subarachnoid hemorrhage with loss of consciousness of any duration with death due to brain injury prior to regaining consciousness, initial encounter                |
| S066X8A | Traumatic subarachnoid hemorrhage with loss of consciousness of any duration with death due to other cause prior to regaining consciousness, initial encounter                 |
| S066X9A | Traumatic subarachnoid hemorrhage with loss of consciousness of unspecified duration, initial encounter                                                                        |
| S066X9D | Traumatic subarachnoid hemorrhage with loss of consciousness of unspecified duration, subsequent encounter                                                                     |
| S066X9S | Traumatic subarachnoid hemorrhage with loss of consciousness of unspecified duration, sequela                                                                                  |
| S06890A | Other specified intracranial injury without loss of consciousness, initial encounter                                                                                           |
| S06890D | Other specified intracranial injury without loss of consciousness, subsequent encounter                                                                                        |
| S06890S | Other specified intracranial injury without loss of consciousness, sequela                                                                                                     |
| S06891A | Other specified intracranial injury with loss of consciousness of 30 minutes or less, initial encounter                                                                        |
| S06891D | Other specified intracranial injury with loss of consciousness of 30 minutes or less, subsequent encounter                                                                     |
| S06891S | Other specified intracranial injury with loss of consciousness of 30 minutes or less, sequela                                                                                  |
| S06892A | Other specified intracranial injury with loss of consciousness of 31 minutes to 59 minutes, initial encounter                                                                  |
| S06892D | Other specified intracranial injury with loss of consciousness of 31 minutes to 59 minutes, subsequent encounter                                                               |
| S06892S | Other specified intracranial injury with loss of consciousness of 31 minutes to 59 minutes, sequela                                                                            |
| S06893A | Other specified intracranial injury with loss of consciousness of 1 hour to 5 hours 59 minutes, initial encounter                                                              |
| S06893D | Other specified intracranial injury with loss of consciousness of 1 hour to 5 hours 59 minutes, subsequent encounter                                                           |
| S06893S | Other specified intracranial injury with loss of consciousness of 1 hour to 5 hours 59 minutes, sequela                                                                        |
| S06894A | Other specified intracranial injury with loss of consciousness of 6 hours to 24 hours, initial encounter                                                                       |
| S06894D | Other specified intracranial injury with loss of consciousness of 6 hours to 24 hours, subsequent encounter                                                                    |
| S06894S | Other specified intracranial injury with loss of consciousness of 6 hours to 24 hours, sequela                                                                                 |
| S06895A | Other specified intracranial injury with loss of consciousness greater than 24 hours with return to pre-existing conscious level, initial encounter                            |
| S06895D | Other specified intracranial injury with loss of consciousness greater than 24 hours with return to pre-existing conscious level, subsequent encounter                         |

|         |                                                                                                                                                                                  |
|---------|----------------------------------------------------------------------------------------------------------------------------------------------------------------------------------|
| S06895S | Other specified intracranial injury with loss of consciousness greater than 24 hours with return to pre-existing conscious level, sequela                                        |
| S06896A | Other specified intracranial injury with loss of consciousness greater than 24 hours without return to pre-existing conscious level with patient surviving, initial encounter    |
| S06896D | Other specified intracranial injury with loss of consciousness greater than 24 hours without return to pre-existing conscious level with patient surviving, subsequent encounter |
| S06896S | Other specified intracranial injury with loss of consciousness greater than 24 hours without return to pre-existing conscious level with patient surviving, sequela              |
| S06897A | Other specified intracranial injury with loss of consciousness of any duration with death due to brain injury prior to regaining consciousness, initial encounter                |
| S06898A | Other specified intracranial injury with loss of consciousness of any duration with death due to other cause prior to regaining consciousness, initial encounter                 |
| S06899A | Other specified intracranial injury with loss of consciousness of unspecified duration, initial encounter                                                                        |
| S06899D | Other specified intracranial injury with loss of consciousness of unspecified duration, subsequent encounter                                                                     |
| S06899S | Other specified intracranial injury with loss of consciousness of unspecified duration, sequela                                                                                  |
| S069X0A | Unspecified intracranial injury without loss of consciousness, initial encounter                                                                                                 |
| S069X0D | Unspecified intracranial injury without loss of consciousness, subsequent encounter                                                                                              |
| S069X0S | Unspecified intracranial injury without loss of consciousness, sequela                                                                                                           |
| S069X1A | Unspecified intracranial injury with loss of consciousness of 30 minutes or less, initial encounter                                                                              |
| S069X1D | Unspecified intracranial injury with loss of consciousness of 30 minutes or less, subsequent encounter                                                                           |
| S069X1S | Unspecified intracranial injury with loss of consciousness of 30 minutes or less, sequela                                                                                        |
| S069X2A | Unspecified intracranial injury with loss of consciousness of 31 minutes to 59 minutes, initial encounter                                                                        |
| S069X2D | Unspecified intracranial injury with loss of consciousness of 31 minutes to 59 minutes, subsequent encounter                                                                     |
| S069X2S | Unspecified intracranial injury with loss of consciousness of 31 minutes to 59 minutes, sequela                                                                                  |
| S069X3A | Unspecified intracranial injury with loss of consciousness of 1 hour to 5 hours 59 minutes, initial encounter                                                                    |
| S069X3D | Unspecified intracranial injury with loss of consciousness of 1 hour to 5 hours 59 minutes, subsequent encounter                                                                 |
| S069X3S | Unspecified intracranial injury with loss of consciousness of 1 hour to 5 hours 59 minutes, sequela                                                                              |
| S069X4A | Unspecified intracranial injury with loss of consciousness of 6 hours to 24 hours, initial encounter                                                                             |
| S069X4D | Unspecified intracranial injury with loss of consciousness of 6 hours to 24 hours, subsequent encounter                                                                          |
| S069X4S | Unspecified intracranial injury with loss of consciousness of 6 hours to 24 hours, sequela                                                                                       |
| S069X5A | Unspecified intracranial injury with loss of consciousness greater than 24 hours with return to pre-existing conscious level, initial encounter                                  |

|         |                                                                                                                                                                              |
|---------|------------------------------------------------------------------------------------------------------------------------------------------------------------------------------|
| S069X5D | Unspecified intracranial injury with loss of consciousness greater than 24 hours with return to pre-existing conscious level, subsequent encounter                           |
| S069X5S | Unspecified intracranial injury with loss of consciousness greater than 24 hours with return to pre-existing conscious level, sequela                                        |
| S069X6A | Unspecified intracranial injury with loss of consciousness greater than 24 hours without return to pre-existing conscious level with patient surviving, initial encounter    |
| S069X6D | Unspecified intracranial injury with loss of consciousness greater than 24 hours without return to pre-existing conscious level with patient surviving, subsequent encounter |
| S069X6S | Unspecified intracranial injury with loss of consciousness greater than 24 hours without return to pre-existing conscious level with patient surviving, sequela              |
| S069X7A | Unspecified intracranial injury with loss of consciousness of any duration with death due to brain injury prior to regaining consciousness, initial encounter                |
| S069X8A | Unspecified intracranial injury with loss of consciousness of any duration with death due to other cause prior to regaining consciousness, initial encounter                 |
| S069X9A | Unspecified intracranial injury with loss of consciousness of unspecified duration, initial encounter                                                                        |
| S069X9D | Unspecified intracranial injury with loss of consciousness of unspecified duration, subsequent encounter                                                                     |
| S069X9S | Unspecified intracranial injury with loss of consciousness of unspecified duration, sequela                                                                                  |

**Supplementary Table S2.** The categories of sleep-wake disturbances (SWD) after TBI. Sample sizes are provided in parentheses.

| Type of SWD                                                                         | Males      | Females    | Total      |
|-------------------------------------------------------------------------------------|------------|------------|------------|
| <b>circadian rhythm sleep disorder</b>                                              | 5.5% (6)   | 3.1% (3)   | 4.4% (9)   |
| <b>difficulty falling asleep at night until the early morning hours<sup>1</sup></b> | 1.8% (2)   | 1.0% (1)   | 1.5% (3)   |
| <b>difficulty sleeping<sup>1</sup></b>                                              | 1.8% (2)   | 1.0% (1)   | 1.5% (3)   |
| <b>disturbance in sleep behavior<sup>1</sup></b>                                    | 5.5% (6)   | 4.1% (4)   | 4.8% (10)  |
| <b>excessive daytime sleepiness<sup>2</sup></b>                                     | 0.9% (1)   | 2.0% (2)   | 1.5% (3)   |
| <b>frequent nocturnal awakening<sup>1</sup></b>                                     | 0% (0)     | 3.1% (3)   | 1.5% (3)   |
| <b>hypersomnia<sup>2</sup></b>                                                      | 5.5% (6)   | 7.1% (7)   | 6.3% (13)  |
| <b>insomnia</b>                                                                     | 22.9% (25) | 28.6% (28) | 25.6% (53) |
| <b>obstructive sleep apnea (OSA)</b>                                                | 10.1% (11) | 5.1% (5)   | 7.7% (16)  |
| <b>sleep difficulties/sleep disorders<sup>1</sup></b>                               | 29.4% (32) | 31.6% (31) | 30.4% (63) |
| <b>sleep patter disturbance<sup>1</sup></b>                                         | 1.8% (1)   | 1.0% (1)   | 1.0% (2)   |
| <b>other</b>                                                                        | 15.6% (17) | 12.2% (12) | 14.0% (29) |

<sup>1</sup>Categories combined into “sleep difficulties/sleep disorders”

<sup>2</sup>Categories combined into “hypersomnia/excessive daytime sleepiness”
